# Supplementary material
Source: publisher site journal article supplement (https://www.dovepress.com/article/443884)
Supplement: Supplementary file 1 [file get_supplementary_file.php]

| Supplementary table 1. Clinical and pathohistological data of patients |        |     |            |          |             |            |              |              |              |       |                      |         |        |           |             |            |             |            |              |         |             |             |        |           |            |                                            |                                                                                                                 |                                                                |              |                                                                                                                 |                                                                              |                                                                                                                                           |                                                                                                                 |                                                                              |                                                                                                                                           |                                           |                                                                              |                                                                                                                                           |                                           |                           |                                           |                                         |                       |                                           |
|------------------------------------------------------------------------|--------|-----|------------|----------|-------------|------------|--------------|--------------|--------------|-------|----------------------|---------|--------|-----------|-------------|------------|-------------|------------|--------------|---------|-------------|-------------|--------|-----------|------------|--------------------------------------------|-----------------------------------------------------------------------------------------------------------------|----------------------------------------------------------------|--------------|-----------------------------------------------------------------------------------------------------------------|------------------------------------------------------------------------------|-------------------------------------------------------------------------------------------------------------------------------------------|-----------------------------------------------------------------------------------------------------------------|------------------------------------------------------------------------------|-------------------------------------------------------------------------------------------------------------------------------------------|-------------------------------------------|------------------------------------------------------------------------------|-------------------------------------------------------------------------------------------------------------------------------------------|-------------------------------------------|---------------------------|-------------------------------------------|-----------------------------------------|-----------------------|-------------------------------------------|
| Physical ex                                                            | Gender | Age | occupation | File ID  | glycosylate | High densi | triglyceride | diastolic pr | total chole; | pulse | Conclusion           | glucose | weight | Determina | Free triiod | Hypersensi | body mass   | Serum thyr | systolic pre | thyroid | thyroid     | Serum triio | height | uric acid | Low densit | Color ultrasound                           | roor                                                                                                            |                                                                |              |                                                                                                                 |                                                                              |                                                                                                                                           |                                                                                                                 |                                                                              |                                                                                                                                           |                                           |                                                                              |                                                                                                                                           |                                           |                           |                                           |                                         |                       |                                           |
| 10002224                                                               | male   | 58  | teacher    | 10001439 | 7.4         | 0.88       | 5.56         | 84           | 5.09         | 76    | Normal blc           | 8.20    | 75.2   | 15.17     | 5.46        | 1.190      | 25.7, overv | 92.13      | 126          | No      | The size ar | 1.65        | 171.2  | 380       | 2.06       | Fatty liver; Hepatic cyst; Left renal cyst | No obvious abnormal ultrasonographic changes of thyroid                                                         | Bilateral carotid intima-media thickening and plaque formation | Fatty liver  | No obvious abnormal ultrasonographic changes of thyroid                                                         | Bilateral carotid intima-media thickening and right plaque formation         | Fatty liver                                                                                                                               | Diffuse thyroid disease (combined with thyroid function examination is recommended); Thyroid nodules (TI-RADS3) | Bilateral carotid intima-media thickening and plaque formation               | Hepatic cyst                                                                                                                              | Multiple thyroid nodules (TI-RADS3)       | Bilateral mammary gland hyperplasia; Left Later al breast nodule (BI-RADS3); | Postmenopausal uterus with calcification of muscle wall; Low echo in the posterior wall of uterus (considering the possibility of myoma); | Bilateral carotid intima-media thickening | Fatty liver; Hepatic cyst | Multiple thyroid nodules (TI-RADS3)       | Hyperplasia of bilateral mammary glands | Postmenopausal uterus | Bilateral carotid intima-media thickening |
| 10002224                                                               | male   | 55  | teacher    | 10000263 | 16.1        | 1.65       | 0.87         | 130          | 5.69         | 69    | Elevated bl          | 5.75    | 64.7   | 16.49     | 5.67        | 1.400      | 22.4, norm  | 101.70     | 148          | No      | The size ar | 1.71        | 169.9  | 348       | 3.54       | Fatty liver                                | Diffuse thyroid disease (combined with thyroid function examination is recommended); Thyroid nodules (TI-RADS3) | Bilateral carotid intima-media thickening and plaque formation | Hepatic cyst | Multiple thyroid nodules (TI-RADS3)                                                                             | Bilateral mammary gland hyperplasia; Left Later al breast nodule (BI-RADS3); | Postmenopausal uterus with calcification of muscle wall; Low echo in the posterior wall of uterus (considering the possibility of myoma); | Bilateral carotid intima-media thickening                                                                       | Fatty liver; Hepatic cyst                                                    | Multiple thyroid nodules (TI-RADS3)                                                                                                       | Hyperplasia of bilateral mammary glands   | Postmenopausal uterus                                                        | Bilateral carotid intima-media thickening                                                                                                 |                                           |                           |                                           |                                         |                       |                                           |
| 10002224                                                               | male   | 50  | teacher    | 10001440 | 7.6         | 0.89       | 1.63         | 90           | 4.32         | 75    | Elevated bl          | 8.85    | 83.8   | 20.98     | 5.60        | 1.060      | 30, obesity | 112.60     | 141          | No      | Thyroid vo  | 1.80        | 167.2  | 324       | 2.75       | Fatty liver; Hepatic cyst                  | No obvious abnormal ultrasonographic changes of thyroid                                                         | Bilateral carotid intima-media thickening and plaque formation | Fatty liver  | Diffuse thyroid disease (combined with thyroid function examination is recommended); Thyroid nodules (TI-RADS3) | Bilateral carotid intima-media thickening and plaque formation               | Hepatic cyst                                                                                                                              | Multiple thyroid nodules (TI-RADS3)                                                                             | Bilateral mammary gland hyperplasia; Left Later al breast nodule (BI-RADS3); | Postmenopausal uterus with calcification of muscle wall; Low echo in the posterior wall of uterus (considering the possibility of myoma); | Bilateral carotid intima-media thickening | Fatty liver; Hepatic cyst                                                    | Multiple thyroid nodules (TI-RADS3)                                                                                                       | Hyperplasia of bilateral mammary glands   | Postmenopausal uterus     | Bilateral carotid intima-media thickening |                                         |                       |                                           |
| 10002224                                                               | female | 58  | teacher    | 10001440 | 5.8         | 1.49       | 1.20         | 63           | 5.86         | 74    | Normal blc           | 4.93    | 59.7   | 16.45     | 4.64        | 0.991      | 23.3, norm  | 111.20     | 99           | No      | The size ar | 1.99        | 159.9  | 310       | 3.70       | Fatty liver; Hepatic cyst                  | No obvious abnormal ultrasonographic changes of thyroid                                                         | Bilateral carotid intima-media thickening                      | Fatty liver  | Diffuse thyroid disease (combined with thyroid function examination is recommended); Thyroid nodules (TI-RADS3) | Bilateral carotid intima-media thickening and plaque formation               | Hepatic cyst                                                                                                                              | Multiple thyroid nodules (TI-RADS3)                                                                             | Bilateral mammary gland hyperplasia; Left Later al breast nodule (BI-RADS3); | Postmenopausal uterus with calcification of muscle wall; Low echo in the posterior wall of uterus (considering the possibility of myoma); | Bilateral carotid intima-media thickening | Fatty liver; Hepatic cyst                                                    | Multiple thyroid nodules (TI-RADS3)                                                                                                       | Hyperplasia of bilateral mammary glands   | Postmenopausal uterus     | Bilateral carotid intima-media thickening |                                         |                       |                                           |
| 10002224                                                               | female | 58  | teacher    | 10001440 | 7.5         | 1.32       | 2.04         | 76           | 4.64         | 86    | Increased $\epsilon$ | 7.34    | 60.7   | 16.55     | 4.80        | 2.250      | 23.6, norm  | 96.83      | 156          | No      | The size ar | 1.61        | 160.3  | 211       | 2.84       | Fatty liver; Hepatic cyst                  | No obvious abnormal ultrasonographic changes of thyroid                                                         | Bilateral carotid intima-media thickening                      | Fatty liver  | Diffuse thyroid disease (combined with thyroid function examination is recommended); Thyroid nodules (TI-RADS3) | Bilateral carotid intima-media thickening and plaque formation               | Hepatic cyst                                                                                                                              | Multiple thyroid nodules (TI-RADS3)                                                                             | Bilateral mammary gland hyperplasia; Left Later al breast nodule (BI-RADS3); | Postmenopausal uterus with calcification of muscle wall; Low echo in the posterior wall of uterus (considering the possibility of myoma); | Bilateral carotid intima-media thickening | Fatty liver; Hepatic cyst                                                    | Multiple thyroid nodules (TI-RADS3)                                                                                                       | Hyperplasia of bilateral mammary glands   | Postmenopausal uterus     | Bilateral carotid intima-media thickening |                                         |                       |                                           |

|          |        |    |         |          |     |      |      |     |      |    |             |      |      |       |      |       |             |        |     |    |              |      |       |     |      |                                                                                                                                                                                                                                                                                                                                                                                                                                                                                                                                                                                                                                                  |
|----------|--------|----|---------|----------|-----|------|------|-----|------|----|-------------|------|------|-------|------|-------|-------------|--------|-----|----|--------------|------|-------|-----|------|--------------------------------------------------------------------------------------------------------------------------------------------------------------------------------------------------------------------------------------------------------------------------------------------------------------------------------------------------------------------------------------------------------------------------------------------------------------------------------------------------------------------------------------------------------------------------------------------------------------------------------------------------|
| 10002224 | female | 56 | teacher | 10001440 | 5.8 | 1.23 | 1.16 | 73  | 4.26 | 63 | Normal blc  | 4.55 | 74.5 | 15.52 | 4.84 | 1.200 | 26.8, overv | 84.37  | 120 | No | The size ar  | 1.51 | 166.7 | 353 | 2.56 | Fatty liver;Relatively low echo in liver (considering the possibility of hemangioma, it is recommended to conduct contrast-enhanced ultrasound examination if necessary)<br>Multiple thyroid nodules (TI-RADS3)<br>Hyperplasia of bilateral mammary glands<br>Postmenopausal uterus<br>Bilateral carotid arteries without obvious abnormality<br>Right renal cyst;Left renal cyst with calcification of cyst wall                                                                                                                                                                                                                                |
| 10002224 | male   | 53 | teacher | 10002224 | 5.2 | 1.42 | 0.94 | 103 | 6.32 | 77 | Elevated bl | 5.75 | 85.7 | 20.56 | 4.69 | 2.290 | 28.3, obesi | 118.10 | 140 | No | The size ar  | 1.27 | 173.9 | 369 | 4.47 | No obvious abnormal ultrasonographic changes of thyroid<br>Bilateral carotid intima-media thickening and plaque formation<br>No obvious abnormal ultrasonographic changes are found in liver, gallbladder, pancreas, spleen and kidneys<br>Thyroid inhomogeneity change (it is recommended to combine thyroid function examination);Thyroid nodules (TI-RADS3)<br>Bilateral mammary gland hyperplasia;Bilateral breast nodules (BI-RADS3);Periodic review is recommended<br>Bilateral carotid arteries without obvious abnormality<br>No obvious abnormal ultrasonographic changes are found in liver, gallbladder, pancreas, spleen and kidneys |
| 10002224 | female | 58 | teacher | 10002224 | 6.1 | 1.15 | 1.68 | 52  | 4.64 | 74 | Diastolic h | 5.71 | 64.8 | 16.74 | 4.72 | 1.790 | 22.9, norm  | 79.51  | 105 | No | The size ar  | 1.33 | 168.4 | 337 | 2.74 | After surgery in the left lobe of thyroid gland;Nodule of right thyroid lobe (TI-RADS3)<br>Hyperplasia of bilateral mammary glands<br>fibroid;Cervical cyst<br>Bilateral carotid arteries without obvious abnormality                                                                                                                                                                                                                                                                                                                                                                                                                            |
| 10002224 | female | 45 | teacher | 10002224 | 5.4 | 0.98 | 1.39 | 84  | 4.34 | 93 | Normal blc  | 4.80 | 63.3 | 16.23 | 4.88 | 1.420 | 23.9, norm  | 88.41  | 139 | No | After the le | 1.51 | 162.8 | 240 | 2.82 |                                                                                                                                                                                                                                                                                                                                                                                                                                                                                                                                                                                                                                                  |

|          |        |    |         |           |     |      |      |     |      |     |                  |       |       |       |       |                    |     |                  |                  |       |                                                                                                                                                                                                                                                                                                                                                        |      |                                                                                                                                                                                                                        |
|----------|--------|----|---------|-----------|-----|------|------|-----|------|-----|------------------|-------|-------|-------|-------|--------------------|-----|------------------|------------------|-------|--------------------------------------------------------------------------------------------------------------------------------------------------------------------------------------------------------------------------------------------------------------------------------------------------------------------------------------------------------|------|------------------------------------------------------------------------------------------------------------------------------------------------------------------------------------------------------------------------|
| 10002224 | male   | 53 | teacher | 10002224  | 6.3 | 1.66 | 3.76 |     | 7.72 |     | 6.83             | 14.10 | 4.17  | 0.996 |       | 92.16              | No  | The size ar 1.40 | 658              | 4.67  | Fatty liver;Intrahepatic strong echo (considering the possibility of hemangioma);Strong echo of right kidney;(Consider the possibility of calcification) Left renal cyst<br>Thyroid nodules (TI-RADS4a, contrast-enhanced ultrasound is recommended)<br>Bilateral carotid intima-media thickening and plaque formation<br>Fatty liver;Right renal cyst |      |                                                                                                                                                                                                                        |
| 10002224 | male   | 56 | teacher | 100002627 | 5.9 | 1.77 | 3.12 |     | 8.19 |     | 5.46             | 16.59 | 4.86  | 1.200 |       | 86.18              | No  | The size ar 1.27 | 418              | 5.34  | Thyroid nodules (TI-RADS3)<br>Bilateral carotid intima-media thickening<br>Fatty liver                                                                                                                                                                                                                                                                 |      |                                                                                                                                                                                                                        |
| 10002224 | male   | 59 | teacher | 10000027  | 6.0 | 1.25 | 1.00 | 75  | 4.26 | 69  | Normal blc 5.50  | 75.7  | 19.36 | 5.73  | 5.150 | 26.7, overv 97.98  | 118 | No               | The size ar 1.64 | 168.3 | 412                                                                                                                                                                                                                                                                                                                                                    | 2.66 | Thyroid nodules (TI-RADS3)<br>Bilateral carotid intima-media thickening and plaque formation<br>Fatty liver;Hepatic cyst                                                                                               |
| 10002224 | female | 50 | teacher | 10000027  | 5.9 | 1.37 | 0.62 | 77  | 3.50 | 66  | Increased c 5.89 | 67.5  | 16.40 | 4.90  | 4.380 | 24.2, overv 100.90 | 140 | No               | The size ar 1.62 | 166.9 | 314                                                                                                                                                                                                                                                                                                                                                    | 1.97 | Thyroid nodules (TI-RADS3)<br>Bilateral mammary gland hyperplasia;Bilateral mammary duct widening<br>Postmenopausal uterus;Cervical cyst<br>Bilateral carotid intima-media thickening<br>Fatty liver;Double renal cyst |
| 10002224 | male   | 59 | teacher | 10000027  | 6.0 | 1.69 | 1.31 | 107 | 6.46 | 100 | Elevated bl 4.67 | 76.9  | 19.10 | 5.78  | 1.110 | 23.7, norm 118.80  | 154 | No               | The size ar 1.93 | 180.1 | 384                                                                                                                                                                                                                                                                                                                                                    | 4.20 | Thyroid nodules (TI-RADS3)<br>Bilateral carotid intima-media thickening and plaque formation<br>Fatty liver;Hepatic cyst;Right renal cyst                                                                              |
| 10002224 | male   | 58 | teacher | 10000027  | 6.2 | 1.07 | 1.64 | 101 | 4.49 | 93  | Elevated bl 5.53 | 76.3  | 17.07 | 6.52  | 2.560 | 25.3, overv 98.48  | 169 | No               | The size ar 2.41 | 173.8 | 425                                                                                                                                                                                                                                                                                                                                                    | 2.75 | Multiple thyroid nodules (TI-RADS3)<br>Bilateral carotid intima-media thickening and plaque formation                                                                                                                  |

|                  |    |         |              |      |      |     |      |     |                 |      |       |      |       |                   |     |    |                  |       |     |      |                                                                                                                                                                                                                                                                                    |
|------------------|----|---------|--------------|------|------|-----|------|-----|-----------------|------|-------|------|-------|-------------------|-----|----|------------------|-------|-----|------|------------------------------------------------------------------------------------------------------------------------------------------------------------------------------------------------------------------------------------------------------------------------------------|
| 10002225C female | 55 | teacher | 10000027E5.7 | 1.67 | 0.83 | 73  | 4.56 | 59  | Normal blc5.66  | 63.3 | 14.94 | 4.16 | 4.390 | 24.3, overv93.34  | 125 | No | The size ar 1.41 | 161.5 | 360 | 2.69 | Fatty liver<br>Diffuse thyroid disease (combined with thyroid function examination is recommended);Thyroid nodules (TI-RADS3)<br>Hyperplasia of bilateral mammary glands<br>Postmenopausal uterus<br>Bilateral carotid intima-media thickening and plaque formation<br>Fatty liver |
| 10002225C male   | 57 | teacher | 10000027E6.2 | 1.14 | 2.98 | 68  | 5.00 | 79  | Normal blc5.08  | 75.7 | 19.12 | 4.81 | 1.170 | 24.3, overv127.10 | 110 | No | The size ar 1.86 | 176.5 | 403 | 2.74 | Thyroid nodules (TI-RADS3)<br>Bilateral carotid intima-media thickening and left plaque formation<br>Fatty liver;Polypoid lesion of gallbladder;Double renal cyst                                                                                                                  |
| 10002225C male   | 43 | teacher | 10000263C5.1 | 1.14 | 2.38 | 81  | 6.00 | 94  | Normal blc6.18  | 78   | 14.93 | 5.62 | 3.080 | 24.5, overv103.30 | 127 | No | The size ar 2.06 | 178.4 | 391 | 4.02 | No obvious abnormal ultrasonographic changes of thyroid<br>Bilateral carotid arteries without obvious abnormality<br>Fatty liver;Double kidney cyst;<br>No obvious abnormal ultrasonographic changes of thyroid                                                                    |
| 10002225C male   | 58 | teacher | 10000263C6.0 | 1.09 | 1.88 | 85  | 5.10 | 67  | Increased ε5.84 | 75.7 | 17.13 | 5.19 | 0.730 | 26.2, overv60.90  | 144 | No | The size ar 1.47 | 169.9 | 426 | 3.25 | Bilateral carotid intima-media thickening and plaque formation<br>Fatty liver;Polypoid lesion of gallbladder<br>Thyroid inhomogeneity change (it is recommended to combine thyroid function examination)                                                                           |
| 10002225C male   | 56 | teacher | 10000262C5.4 | 1.75 | 1.06 | 122 | 6.26 | 102 | Elevated bl4.99 | 65.6 | 19.29 | 5.28 | 5.130 | 21.3, norm121.50  | 177 | No | The size ar 1.81 | 175.7 | 315 | 3.81 | Bilateral carotid intima-media thickening and plaque formation<br>Fatty liver;Polypoid changes of gallbladder<br>Thyroid nodules (TI-RADS3)<br>Bilateral mammary gland hyperplasia;Bilateral breast nodules (BI-RADS3)                                                             |
| 10002225C female | 52 | teacher | 10000263C5.9 | 1.12 | 1.58 | 76  | 5.24 | 79  | Normal blc5.12  | 80.6 | 18.11 | 4.74 | 1.710 | 30.3, obesi111.60 | 132 | No | The size ar 1.64 | 163.2 | 415 | 3.35 | Postmenopausal uterus;Endometrium thickening, further examination is recommended;fibroid<br>Bilateral carotid intima-media thickening                                                                                                                                              |

|           |        |    |         |              |      |      |    |      |    |               |      |      |       |      |       |             |        |     |    |             |      |       |     |      |                                                                                                                                                                                                                                                                                        |
|-----------|--------|----|---------|--------------|------|------|----|------|----|---------------|------|------|-------|------|-------|-------------|--------|-----|----|-------------|------|-------|-----|------|----------------------------------------------------------------------------------------------------------------------------------------------------------------------------------------------------------------------------------------------------------------------------------------|
| 100022250 | male   | 57 | teacher | 1000026315.9 | 1.15 | 1.40 | 82 | 5.99 | 57 | Normal blc    | 6.17 | 64.1 | 14.53 | 4.51 | 1.080 | 23.1, norm  | 79.82  | 128 | No | The size ar | 1.61 | 166.6 | 315 | 3.87 | Fatty liver;Hepatic cyst<br>No obvious abnormal ultrasonographic changes of thyroid<br>Bilateral carotid intima-media thickening and plaque formation<br>Fatty liver<br>Diffuse thyroid disease (combined with thyroid function examination is recommended);Thyroid nodules (TI-RADS3) |
| 100022250 | female | 48 | teacher | 1000026315.8 | 0.77 | 1.15 | 74 | 3.21 | 77 | Normal blc    | 5.93 | 63.5 | 15.41 | 6.35 | 2.330 | 23.7, norm  | 70.26  | 106 | No | The size ar | 1.67 | 163.6 | 290 | 1.94 | Local left breast surgery;Bilateral breast local duct dilatation;Bilateral mammary gland hyperplasia;Right breast nodule (BI-RADS3);<br>fibroid;Cervical cyst<br>Bilateral carotid intima-media thickening and left plaque formation<br>Fatty liver;Hepatic cyst                       |
| 100022250 | male   | 53 | teacher | 1000144006.7 | 1.04 | 1.45 | 81 | 3.67 | 74 | Normal blc    | 5.96 | 70.7 | 16.75 | 5.48 | 1.090 | 23.5, norm  | 109.60 | 116 | No | The size ar | 1.97 | 173.4 | 327 | 1.96 | No obvious abnormal ultrasonographic changes of thyroid<br>Bilateral carotid intima-media thickening and left plaque formation<br>Fatty liver;Hepatic cyst                                                                                                                             |
| 100022250 | male   | 53 | teacher | 1000144006.1 | 1.72 | 1.36 | 82 | 4.85 | 81 | Normal blc    | 5.16 | 77.6 | 20.26 | 5.62 | 1.830 | 24.2, overv | 97.74  | 134 | No | The size ar | 1.57 | 179.1 | 389 | 2.75 | No obvious abnormal ultrasonographic changes of thyroid<br>Bilateral carotid intima-media thickening<br>Fatty liver                                                                                                                                                                    |
| 100022251 | male   | 56 | teacher | 1000144015.6 | 1.22 | 1.38 | 85 | 5.07 | 71 | Increased blc | 4.97 | 87   | 17.07 | 4.51 | 1.040 | 25.4, overv | 66.75  | 142 | No | The size ar | 1.09 | 185.1 | 365 | 3.03 | No obvious abnormal ultrasonographic changes of thyroid<br>Bilateral carotid intima-media thickening and plaque formation<br>Fatty liver;Hepatic cyst;Low echo in right adrenal area, further examination or reexamination is recommended                                              |
| 100022486 | male   | 67 | teacher | 1000002725.6 | 1.03 | 2.23 | 92 | 4.77 | 68 | Elevated blc  | 5.49 | 80.8 | 16.40 | 6.96 | 2.200 | 27.6, overv | 113.90 | 164 | No | The size ar | 2.48 | 171.1 | 413 | 3.13 | The echo of thyroid parenchyma is thickened (combined with thyroid function examination is recommended);Thyroid nodules (TI-RADS3)<br>Bilateral carotid intima-media thickening and plaque formation                                                                                   |

|           |        |    |         |           |     |      |      |    |      |    |                    |      |      |       |       |       |               |            |       |     |                       |             |       |       |      |                                                                                                                                                                                                                                                                                                                                                                                                                                                                                                                                                                                                                                     |                                                                                                                                                                                                                                                                                                                                                                                                                                                 |
|-----------|--------|----|---------|-----------|-----|------|------|----|------|----|--------------------|------|------|-------|-------|-------|---------------|------------|-------|-----|-----------------------|-------------|-------|-------|------|-------------------------------------------------------------------------------------------------------------------------------------------------------------------------------------------------------------------------------------------------------------------------------------------------------------------------------------------------------------------------------------------------------------------------------------------------------------------------------------------------------------------------------------------------------------------------------------------------------------------------------------|-------------------------------------------------------------------------------------------------------------------------------------------------------------------------------------------------------------------------------------------------------------------------------------------------------------------------------------------------------------------------------------------------------------------------------------------------|
| 100022487 | male   | 57 | teacher | 100000272 | 5.2 | 1.83 | 1.15 | 79 | 4.17 | 64 | Normal blc         | 4.52 | 73.2 | 15.08 | 5.11  | 1.510 | 23.9, norm    | 98.22      | 123   | No  | The size ar           | 1.54        | 175   | 307   | 2.06 | Small cysts of both kidneys<br>No obvious abnormal ultrasonographic changes of thyroid<br>Slightly thickened intima-media of bilateral carotid arteries<br>Right kidney stone;Spleen is extremely hypoechoic (considering the possibility of cyst);The left kidney is slightly hyperechoic (considering the possibility of hamartoma)<br>Thyroid nodules (M: TI-RADS4a, remaining nodules: TI-RADS3), close observation, reexamination and further examination are recommended if necessary<br>Hyperplasia of bilateral mammary glands<br>Postmenopausal uterus;fibroid<br>Bilateral carotid intima-media thickening<br>Fatty liver |                                                                                                                                                                                                                                                                                                                                                                                                                                                 |
| 100022486 | female | 57 | teacher | 100000272 | 6.0 | 1.34 | 0.88 | 85 | 5.08 | 92 | Increased systolic | 5.23 | 63.3 | 16.39 | 5.22  | 3.430 | 23.5, norm    | 101.40     | 140   | No  |                       | 1.51        | 164.1 | 242   | 3.22 | Thyroid nodules (TI-RADS3)<br>Bilateral carotid intima-media thickening and right plaque formation<br>Hepatic cyst;Left renal cyst;<br>Thyroid nodules (TI-RADS3)<br>Bilateral carotid intima-media thickening<br>Liver, gallbladder, pancreas, spleen and kidneys have no obvious abnormal ultrasonographic changes<br>Hypoechoic thyroid isthmus (after considering ablation treatment);Multiple thyroid nodules (TI-RADS3)<br>Hyperplasia of bilateral mammary glands<br>Postmenopausal uterus;Hysteromyoma with partial calcification<br>Bilateral carotid intima-media thickening                                              |                                                                                                                                                                                                                                                                                                                                                                                                                                                 |
| 100022486 | male   | 53 | teacher | 100000272 | 3   |      |      | 87 |      | 85 | Increased systolic | blc  | 87.3 |       |       |       | 30.8, obesity |            | 143   | No  | The size and shape of | 168.4       |       |       |      | Thyroid nodules (TI-RADS3)<br>Bilateral carotid intima-media thickening and right plaque formation<br>Hepatic cyst;Left renal cyst;<br>Thyroid nodules (TI-RADS3)<br>Bilateral carotid intima-media thickening<br>Liver, gallbladder, pancreas, spleen and kidneys have no obvious abnormal ultrasonographic changes<br>Hypoechoic thyroid isthmus (after considering ablation treatment);Multiple thyroid nodules (TI-RADS3)<br>Hyperplasia of bilateral mammary glands<br>Postmenopausal uterus;Hysteromyoma with partial calcification<br>Bilateral carotid intima-media thickening                                              |                                                                                                                                                                                                                                                                                                                                                                                                                                                 |
| 100022487 | male   | 55 | teacher | 100002626 | 5.4 | 1.36 | 1.45 | 72 | 4.72 | 76 | Normal blc         | 5.15 | 69   | 15.29 | 5.92  | 1.350 | 22.6, norm    | 93.67      | 110   | No  | The size ar           | 1.93        | 174.6 | 299   | 2.85 | Thyroid nodules (TI-RADS3)<br>Bilateral carotid intima-media thickening<br>Liver, gallbladder, pancreas, spleen and kidneys have no obvious abnormal ultrasonographic changes<br>Hypoechoic thyroid isthmus (after considering ablation treatment);Multiple thyroid nodules (TI-RADS3)<br>Hyperplasia of bilateral mammary glands<br>Postmenopausal uterus;Hysteromyoma with partial calcification<br>Bilateral carotid intima-media thickening                                                                                                                                                                                     |                                                                                                                                                                                                                                                                                                                                                                                                                                                 |
| 100022246 | female | 55 | teacher | 100022246 | 5.9 | 1.53 | 0.53 | 59 | 5.76 | 70 | Diastolic          | hy   | 4.78 | 62.6  | 15.98 | 5.13  | 1.070         | 22.6, norm | 89.07 | 103 | No                    | The size ar | 1.58  | 166.6 | 308  | 3.73                                                                                                                                                                                                                                                                                                                                                                                                                                                                                                                                                                                                                                | Thyroid nodules (TI-RADS3)<br>Bilateral carotid intima-media thickening<br>Liver, gallbladder, pancreas, spleen and kidneys have no obvious abnormal ultrasonographic changes<br>Hypoechoic thyroid isthmus (after considering ablation treatment);Multiple thyroid nodules (TI-RADS3)<br>Hyperplasia of bilateral mammary glands<br>Postmenopausal uterus;Hysteromyoma with partial calcification<br>Bilateral carotid intima-media thickening |

|          |        |    |         |          |     |      |      |    |      |    |             |      |      |       |      |       |             |        |     |    |             |      |       |     |      |                                                                                                                                                                                                                                                                                                                                                                                                                                                                                                                                                              |
|----------|--------|----|---------|----------|-----|------|------|----|------|----|-------------|------|------|-------|------|-------|-------------|--------|-----|----|-------------|------|-------|-----|------|--------------------------------------------------------------------------------------------------------------------------------------------------------------------------------------------------------------------------------------------------------------------------------------------------------------------------------------------------------------------------------------------------------------------------------------------------------------------------------------------------------------------------------------------------------------|
| 10002245 | male   | 83 | teacher | 10000028 | 6.0 | 1.61 | 0.97 | 79 | 3.22 | 71 | Normal blc  | 5.10 | 65.1 | 15.94 | 4.19 | 1.570 | 20.4, norm  | 84.17  | 139 | No | The size ar | 1.22 | 178.5 | 314 | 1.45 | No obvious abnormal ultrasonographic changes are found in liver, gallbladder, pancreas, spleen and kidneys<br>Thyroid nodules (TI-RADS3)<br>Bilateral carotid intima-media thickening and plaque formation<br>Fatty liver;Hepatic cyst;Polypoid changes of gallbladder                                                                                                                                                                                                                                                                                       |
| 10002245 | female | 62 | teacher | 10002245 | 5.7 | 1.39 | 2.36 | 99 | 3.43 | 74 | Elevated bl | 5.22 | 62.8 | 16.88 | 5.00 | 2.770 | 24.8, overv | 98.00  | 178 | No | The size ar | 1.61 | 159.1 | 407 | 1.46 | Thyroid nodules (TI-RADS3)<br>Hyperplasia of bilateral mammary glands<br>Bilateral carotid intima-media thickening and plaque formation<br>No obvious abnormal ultrasonographic changes are found in liver, gallbladder, pancreas, spleen and kidneys                                                                                                                                                                                                                                                                                                        |
| 10002245 | male   | 65 | teacher | 10000028 | 6.6 | 1.46 | 0.78 | 78 | 4.81 | 93 | Increased ε | 7.82 | 67.1 | 16.40 | 5.30 | 1.640 | 20.7, norm  | 81.59  | 145 | No | The size ar | 1.90 | 180   | 248 | 2.90 | No obvious abnormal ultrasonographic changes of thyroid<br>Bilateral carotid intima-media thickening and plaque formation<br>Hepatic cyst<br>Thyroid nodules (TI-RADS3)<br>Bilateral mammary gland hyperplasia;Bilateral breast nodules (M1, M2: BI-RADS4a, other nodules: BI-RADS3);It is recommended to conduct further examination and reexamination when necessary, and to conduct contrast-enhanced ultrasound examination<br>fibroid;Cervical cyst<br>Bilateral carotid arteries without obvious abnormality<br>Gallstone;Splenomegaly;Left renal cyst |
| 10002227 | female | 50 | teacher | 10002227 | 5.6 | 1.69 | 0.86 | 71 | 4.26 | 77 | Normal blc  | 4.79 | 59.8 | 17.29 | 5.15 | 2.030 | 22.6, norm  | 98.86  | 114 | No | The size ar | 2.02 | 162.7 | 289 | 2.13 | Thyroid nodules (TI-RADS3)<br>Bilateral mammary glands without obvious abnormality<br>Senile uterus<br>Bilateral carotid intima-media thickening and plaque formation                                                                                                                                                                                                                                                                                                                                                                                        |
| 10002225 | female | 90 | teacher | 10000026 | 5.9 | 0.97 | 0.82 | 67 | 3.71 | 72 | Increased ε | 5.88 | 56.4 | 14.89 | 3.64 | 6.040 | 22.6, norm  | 103.60 | 149 | No | The size ar | 1.27 | 158.1 | 266 | 2.23 |                                                                                                                                                                                                                                                                                                                                                                                                                                                                                                                                                              |

|           |        |    |         |           |     |      |      |    |      |    |           |      |      |       |       |       |             |             |        |     |             |             |       |       |      |                                                                                                                                                                                                                                                                                                                                                                                                                                                                                                                                                                                                                     |                                                                                                                                                                                                                                                                                |
|-----------|--------|----|---------|-----------|-----|------|------|----|------|----|-----------|------|------|-------|-------|-------|-------------|-------------|--------|-----|-------------|-------------|-------|-------|------|---------------------------------------------------------------------------------------------------------------------------------------------------------------------------------------------------------------------------------------------------------------------------------------------------------------------------------------------------------------------------------------------------------------------------------------------------------------------------------------------------------------------------------------------------------------------------------------------------------------------|--------------------------------------------------------------------------------------------------------------------------------------------------------------------------------------------------------------------------------------------------------------------------------|
| 100022255 | female | 89 | teacher | 100000265 | 5.7 | 1.77 | 1.17 | 68 | 4.44 | 76 | Increased | 5.27 | 64.6 | 15.49 | 4.29  | 3.960 | 27.3, overv | 103.70      | 171    | No  | The size ar | 1.42        | 153.7 | 323   | 2.40 | Left renal cyst<br>Thyroid nodules (TI-RADS3)<br>Bilateral mammary glands without obvious abnormality<br>Bilateral carotid intima-media thickening and plaque formation<br>Fatty liver<br>No obvious abnormal ultrasonographic changes of thyroid<br>Bilateral carotid intima-media thickening and plaque formation<br>Fatty liver;Left renal cyst                                                                                                                                                                                                                                                                  |                                                                                                                                                                                                                                                                                |
| 100022881 | male   | 62 | teacher | 100022881 | 4.7 | 1.89 | 0.55 | 78 | 5.86 | 51 | Increased | 4.97 | 85.7 | 19.32 | 3.92  | 0.948 | 27.7, overv | 103.10      | 157    | No  | The size ar | 1.02        | 175.8 | 301   | 3.62 | Left lobe nodule of thyroid (TI-RADS4a), reexamination is recommended, if necessary, further examination such as contrast-enhanced ultrasound<br>Bilateral carotid intima-media thickening and plaque formation<br>Fatty liver;Intrahepatic hyperechogenicity (considering the possibility of hemangioma, it is recommended to conduct contrast-enhanced ultrasound examination if necessary);Conform to the sonogram of cholecystitis;<br>Diffuse thyroid disease (combined with thyroid function examination is recommended);Left lobe nodule of thyroid (TI-RADS2);<br>Bilateral carotid intima-media thickening |                                                                                                                                                                                                                                                                                |
| 100022905 | male   | 58 | teacher | 100012075 | 6.1 | 1.14 | 1.71 | 60 | 4.42 | 87 | Normal    | blc  | 4.65 | 68.5  | 18.96 | 5.52  | 2.920       | 25, overwe  | 105.10 | 121 | No          | The size ar | 1.86  | 165.4 | 247  | 2.59                                                                                                                                                                                                                                                                                                                                                                                                                                                                                                                                                                                                                | Low echo in liver (considering the possibility of hemangioma, it is recommended to conduct contrast-enhanced ultrasound examination if necessary);Hepatic cyst;Left renal cyst<br>Thyroid nodules (TI-RADS3)<br>Bilateral carotid intima-media thickening and plaque formation |
| 100022905 | male   | 52 | teacher | 100022905 | 5.8 | 1.09 | 2.06 | 82 | 5.13 | 87 | Normal    | blc  | 5.87 | 68.7  | 21.57 | 5.54  | 0.912       | 24.9, overv | 120.20 | 120 | No          | The thyroic | 1.70  | 166.1 | 407  | 3.11                                                                                                                                                                                                                                                                                                                                                                                                                                                                                                                                                                                                                |                                                                                                                                                                                                                                                                                |
| 100023420 | female | 92 | teacher | 100023420 |     |      |      |    |      |    |           |      |      |       |       |       |             |             |        | No  |             |             |       |       |      |                                                                                                                                                                                                                                                                                                                                                                                                                                                                                                                                                                                                                     |                                                                                                                                                                                                                                                                                |
| 100023295 | male   | 87 | teacher | 100000275 | 5.6 | 1.16 | 1.32 | 73 | 5.47 | 75 | Increased | 5.08 | 68.1 | 15.60 | 4.11  | 2.390 | 24.2, overv | 95.44       | 141    | No  | The size ar | 1.54        | 167.7 | 353   | 3.54 |                                                                                                                                                                                                                                                                                                                                                                                                                                                                                                                                                                                                                     |                                                                                                                                                                                                                                                                                |



|           |      |    |         |              |      |      |     |      |    |                 |      |       |      |       |             |        |     |    |                  |       |     |      |                                                                                                                                                                                                                                                                                                                                                                                                                  |
|-----------|------|----|---------|--------------|------|------|-----|------|----|-----------------|------|-------|------|-------|-------------|--------|-----|----|------------------|-------|-----|------|------------------------------------------------------------------------------------------------------------------------------------------------------------------------------------------------------------------------------------------------------------------------------------------------------------------------------------------------------------------------------------------------------------------|
| 100022877 | male | 49 | teacher | 1000120775.7 | 0.89 | 2.66 | 96  | 4.09 | 82 | Elevated bl5.28 | 84.1 | 18.13 | 5.43 | 3.130 | 25.1, overv | 98.61  | 140 | No | The size ar 1.67 | 183.1 | 414 | 2.24 | Fatty liver;Hepatic cyst;Right renal cyst<br>Multiple thyroid nodules (TI-RADS3)<br>Bilateral carotid arteries without obvious abnormality<br>Hepatic cyst<br>Thyroid echo thickening (combined with thyroid function examination is recommended)<br>Bilateral carotid intima-media thickening and plaque formation<br>Fatty liver;Right kidney stone<br>No obvious abnormal ultrasonographic changes of thyroid |
| 100022877 | male | 84 | teacher | 1000120775.7 | 2.29 | 0.60 | 89  | 5.26 | 76 | Increased ε4.44 | 50.6 | 16.82 | 3.90 | 3.450 | 17.8, unde  | 96.69  | 174 | No | The size ar 1.18 | 168.4 | 150 | 2.78 | Bilateral carotid intima-media thickening and plaque formation<br>Fatty liver;Right kidney stone<br>No obvious abnormal ultrasonographic changes of thyroid                                                                                                                                                                                                                                                      |
| 100022877 | male | 55 | teacher | 1000120775.9 | 1.20 | 1.37 | 87  | 4.93 | 76 | Normal blc4.86  | 90.7 | 15.48 | 5.36 | 1.320 | 26.9, overv | 92.93  | 139 | No | The size ar 1.79 | 183.6 | 328 | 3.39 | Bilateral carotid intima-media thickening and plaque formation<br>Fatty liver;Hepatic cyst;Left renal cyst<br>Multiple thyroid nodules (TI-RADS3)<br>Bilateral carotid intima-media thickening and plaque formation<br>Left renal cyst<br>No obvious abnormal ultrasonographic changes of thyroid                                                                                                                |
| 100022877 | male | 50 | teacher | 1000120775.5 | 1.34 | 1.60 | 105 | 4.31 | 77 | Elevated bl4.59 | 84.5 | 14.07 | 5.94 | 1.480 | 27.5, overv | 82.25  | 153 | No | The size ar 1.84 | 175.4 | 459 | 2.32 | Left renal cyst<br>No obvious abnormal ultrasonographic changes of thyroid                                                                                                                                                                                                                                                                                                                                       |
| 100022877 | male | 53 | teacher | 1000228775.4 | 1.27 | 1.62 | 95  | 5.09 | 72 | Elevated bl5.16 | 74.8 | 15.77 | 4.79 | 4.340 | 23.7, norm  | 85.82  | 143 | No | The size ar 1.36 | 177.7 | 274 | 3.24 | Bilateral carotid arteries without obvious abnormality<br>Fatty liver;After cholecystectomy<br>No obvious abnormal ultrasonographic changes of thyroid                                                                                                                                                                                                                                                           |
| 100022877 | male | 58 | teacher | 1000120776.4 | 1.29 | 1.46 | 84  | 3.72 | 74 | Normal blc6.43  | 73.4 | 14.44 | 4.96 | 3.490 | 24.8, overv | 98.84  | 114 | No | The size ar 1.93 | 171.9 | 326 | 1.98 | Bilateral carotid intima-media thickening and right plaque formation<br>Fatty liver<br>Multiple thyroid nodules (TI-RADS3)                                                                                                                                                                                                                                                                                       |
| 100022877 | male | 51 | teacher | 1000120775.6 | 1.18 | 0.84 | 92  | 5.08 | 88 | Elevated di5.00 | 88.3 | 18.09 | 5.83 | 1.210 | 30.5, obesi | 121.50 | 136 | No | The size ar 2.06 | 170.1 | 281 | 3.43 | Bilateral carotid intima-media thickening and plaque formation<br>Fatty liver;Left renal cyst<br>Thyroid inhomogeneity (combined with thyroid function examination is recommended)                                                                                                                                                                                                                               |
| 100022877 | male | 58 | teacher | 1000120775.5 | 0.84 | 2.69 | 89  | 5.40 | 65 | Normal blc4.72  | 76.8 | 19.16 | 4.92 | 1.310 | 27.6, overv | 117.20 | 130 | No | The size ar 1.56 | 166.8 | 275 | 3.25 | Bilateral carotid intima-media thickening                                                                                                                                                                                                                                                                                                                                                                        |

|          |        |    |         |           |     |      |      |    |      |    |           |     |      |      |       |      |       |             |        |     |    |             |      |       |     |      |                                                                                                                                                                                                                                                                                                                                                                                                                                                                              |
|----------|--------|----|---------|-----------|-----|------|------|----|------|----|-----------|-----|------|------|-------|------|-------|-------------|--------|-----|----|-------------|------|-------|-----|------|------------------------------------------------------------------------------------------------------------------------------------------------------------------------------------------------------------------------------------------------------------------------------------------------------------------------------------------------------------------------------------------------------------------------------------------------------------------------------|
| 10002287 | female | 55 | teacher | 100012077 | 6.4 | 1.12 | 1.64 | 81 | 5.94 | 70 | Normal    | blc | 5.79 | 66.2 | 13.97 | 4.78 | 3.120 | 24.8, overv | 90.61  | 136 | No | The size ar | 1.52 | 163.4 | 287 | 3.87 | Fatty liver;Hepatic cyst<br>Thyroid nodules (TI-RADS3)<br>Bilateral mammary gland hyperplasia;LeftLater al breast nodule (BI-RADS3)<br>Postmenopausal uterus;fibroid<br>Bilateral carotid intima-media thickening<br>Splenomegaly<br>Multiple thyroid nodules (TI-RADS3)<br>Bilateral carotid intima-media thickening<br>Hepatic cyst;Polypoid lesion of gallbladder<br>No obvious abnormal ultrasonographic changes of thyroid<br>Bilateral carotid intima-media thickening |
| 10002287 | male   | 51 | teacher | 100012077 | 5.5 | 1.25 | 0.64 | 71 | 3.99 | 64 | Normal    | blc | 5.81 | 73   | 19.23 | 5.72 | 1.370 | 23.9, norm  | 124.60 | 115 | No | The size ar | 1.90 | 174.7 | 361 | 2.32 |                                                                                                                                                                                                                                                                                                                                                                                                                                                                              |
| 10002287 | male   | 58 | teacher | 10002287  | 5.9 | 1.19 | 0.96 | 85 | 3.81 | 74 | Increased | ε   | 5.66 | 63.7 | 19.24 | 5.61 | 1.320 | 21.8, norm  | 104.40 | 140 | No | The size ar | 1.74 | 170.9 | 267 | 2.31 |                                                                                                                                                                                                                                                                                                                                                                                                                                                                              |
| 10002287 | female | 55 | teacher | 10002287  | 5.3 | 1.91 | 1.07 | 74 | 5.44 | 79 | Normal    | blc | 4.48 | 51.8 | 16.33 | 3.98 | 1.840 | 18.6, norm  | 95.70  | 127 | No | After surge | 1.61 | 166.9 | 191 | 3.10 | No obvious abnormal ultrasonographic changes are found in liver, gallbladder, pancreas, spleen and kidneys                                                                                                                                                                                                                                                                                                                                                                   |
| 10002287 | female | 57 | teacher | 10002287  | 6.1 | 1.66 | 2.29 | 75 | 4.74 | 93 | Increased | ε   | 4.85 | 61.2 | 15.06 | 4.59 | 3.650 | 23.7, norm  | 81.73  | 140 | No | The size ar | 1.75 | 160.8 | 277 | 2.27 | Thyroid nodules (TI-RADS3)<br>Bilateral mammary glands without obvious abnormality<br>Hysteromyoma with calcification<br>Bilateral carotid arteries without obvious abnormality<br>Hepatic cyst;Intrahepatic calcification                                                                                                                                                                                                                                                   |
| 10002287 | male   | 53 | teacher | 10002287  | 5.3 | 1.90 | 0.77 | 89 | 4.46 | 67 | Increased | ε   | 4.66 | 66.5 | 18.61 | 5.40 | 1.520 | 24.9, overv | 108.50 | 140 | No | The size ar | 1.85 | 163.5 | 378 | 2.43 | Thyroid nodules (TI-RADS2)<br>Bilateral carotid intima-media thickening<br>Fatty liver                                                                                                                                                                                                                                                                                                                                                                                       |
| 10002287 | male   | 52 | teacher | 10002287  | 6.2 | 1.27 | 1.20 | 92 | 5.52 | 75 | Elevated  | bl  | 7.40 | 77.2 | 15.46 | 6.55 | 3.680 | 26.7, overv | 85.51  | 147 | No | The size ar | 2.26 | 170   | 377 | 3.77 | Thyroid nodules (TI-RADS3)<br>Bilateral carotid intima-media thickening<br>Fatty liver                                                                                                                                                                                                                                                                                                                                                                                       |
| 10002287 | male   | 60 | teacher | 10002287  | 5.5 | 1.78 | 0.92 | 83 | 5.93 | 56 | Increased | ε   | 6.10 | 82   | 15.47 | 5.33 | 2.540 | 26.3, overv | 71.60  | 144 | No | The size ar | 1.33 | 176.5 | 491 | 3.81 | Thyroid nodules (TI-RADS3);Periodic review is recommended<br>Bilateral carotid intima-media thickening<br>Polypoid lesion of gallbladder                                                                                                                                                                                                                                                                                                                                     |
| 10002287 | male   | 60 | teacher | 100012077 | 5.8 | 1.11 | 1.01 | 87 | 4.32 | 78 | Normal    | blc | 4.89 | 76.4 | 16.67 | 5.28 | 3.390 | 27.2, overv | 82.09  | 126 | No | The size ar | 1.63 | 167.7 | 440 | 2.80 | Left lobe nodule of thyroid (TI-RADS3)<br>Bilateral carotid intima-media thickening and left plaque formation                                                                                                                                                                                                                                                                                                                                                                |

|          |        |    |         |          |     |      |      |    |      |    |           |      |       |       |       |       |             |             |        |     |             |             |       |       |      |                                                                                                                                                                                                                                                                                                                                                                                                                                              |                                                                                                                                                                                                                                                                                                                                                                                                                       |
|----------|--------|----|---------|----------|-----|------|------|----|------|----|-----------|------|-------|-------|-------|-------|-------------|-------------|--------|-----|-------------|-------------|-------|-------|------|----------------------------------------------------------------------------------------------------------------------------------------------------------------------------------------------------------------------------------------------------------------------------------------------------------------------------------------------------------------------------------------------------------------------------------------------|-----------------------------------------------------------------------------------------------------------------------------------------------------------------------------------------------------------------------------------------------------------------------------------------------------------------------------------------------------------------------------------------------------------------------|
| 10002287 | male   | 91 | teacher | 10000026 | 6.4 | 1.51 | 1.09 | 61 | 5.42 | 68 | Increased | 7.08 | 69    | 20.20 | 5.22  | 2.010 | 23.4, norm  | 106.00      | 144    | No  | The size ar | 1.53        | 171.9 | 344   | 3.42 | Fatty liver;Intrahepatic calcification;It is recommended to further check and recheck if necessary<br>Thyroid nodules (TI-RADS3);Periodic review is recommended<br>Bilateral carotid intima-media thickening and plaque formation;Local stenosis of bilateral carotid arteries (left: 50-69%, right estimated: 50-69%);It is recommended to recheck and further check if necessary<br>Left renal cyst<br>Multiple thyroid nodules (TI-RADS3) |                                                                                                                                                                                                                                                                                                                                                                                                                       |
| 10002287 | male   | 94 | teacher | 10000026 | 6.0 | 2.15 | 0.88 | 57 | 4.57 | 84 | Abnormal  | 5.39 | 56.8  | 17.17 | 4.89  | 0.481 | 20. Norma   | 96.71       | 151    | No  | The size ar | 1.60        | 168.7 | 223   | 2.09 | Bilateral carotid intima-media thickening and plaque formation<br>Right renal cyst<br>Thyroid nodules (TI-RADS3)                                                                                                                                                                                                                                                                                                                             |                                                                                                                                                                                                                                                                                                                                                                                                                       |
| 10002287 | male   | 67 | teacher | 10000026 | 5.7 | 1.33 | 1.38 | 73 | 4.36 | 85 | Normal    | blc  | 4.86  | 60.9  | 17.74 | 5.60  | 1.110       | 21.4, norm  | 93.64  | 137 | No          | The size ar | 1.60  | 168.6 | 374  | 2.47                                                                                                                                                                                                                                                                                                                                                                                                                                         | Bilateral carotid intima-media thickening and plaque formation<br>Fatty liver;Conform to the sonogram of cholecystitis;Double kidney cyst;Left renal calcification<br>Diffuse thyroid disease (combined with thyroid function examination is recommended);<br>Bilateral carotid intima-media thickening and left plaque formation<br>Fatty liver;Hepatic cyst;Silty gallstone;After left nephrectomy;Right renal cyst |
| 10002287 | male   | 90 | teacher | 10000339 | 6.0 | 0.93 | 0.56 | 57 | 3.34 | 67 | Abnormal  | 5.29 | 105.3 | 13.41 | 4.00  | 3.250 | 35.3, obesi | 72.34       | 141    | No  | The size ar | 1.16        | 172.6 | 377   | 2.25 | After subtotal thyroidectomy<br>Bilateral carotid intima-media thickening and plaque formation<br>Fatty liver;Hepatic cyst<br>Contrast enhanced ultrasonography is recommended for thyroid nodules (M: TI-RADS4a, remaining nodules TI-RADS3)                                                                                                                                                                                                |                                                                                                                                                                                                                                                                                                                                                                                                                       |
| 10002287 | male   | 81 | teacher | 10001207 | 7.2 | 1.19 | 3.77 | 62 | 5.24 | 82 | Normal    | blc  | 7.63  | 80.9  | 18.35 | 3.48  | 2.550       | 27.3, overv | 106.30 | 135 | No          | After subtc | 1.03  | 172   | 258  | 2.24                                                                                                                                                                                                                                                                                                                                                                                                                                         | Bilateral carotid intima-media thickening and plaque formation<br>Fatty liver;Hepatic cyst<br>Contrast enhanced ultrasonography is recommended for thyroid nodules (M: TI-RADS4a, remaining nodules TI-RADS3)                                                                                                                                                                                                         |
| 10002287 | female | 89 | teacher | 10000026 | 6.2 | 1.95 | 0.97 | 69 | 3.80 | 86 | Increased | 7.19 | 58.2  | 18.99 | 4.98  | 5.160 | 22.6, norm  | 115.10      | 161    | No  | The size ar | 1.65        | 160.6 | 324   | 1.41 | Bilateral mammary glands without obvious abnormality<br>Senile uterus<br>Bilateral carotid intima-media thickening and right plaque formation                                                                                                                                                                                                                                                                                                |                                                                                                                                                                                                                                                                                                                                                                                                                       |

|          |      |    |         |          |     |      |      |    |      |    |                      |      |      |       |      |       |             |        |     |    |             |      |       |     |      |                                                                                                                                                                                                                                                                        |
|----------|------|----|---------|----------|-----|------|------|----|------|----|----------------------|------|------|-------|------|-------|-------------|--------|-----|----|-------------|------|-------|-----|------|------------------------------------------------------------------------------------------------------------------------------------------------------------------------------------------------------------------------------------------------------------------------|
| 10002287 | male | 81 | teacher | 10001207 | 6.0 | 1.52 | 0.83 | 57 | 3.23 | 54 | Diastolic h          | 4.61 | 72.2 | 13.72 | 4.49 | 9.270 | 24.2, overv | 94.52  | 131 | No | The size ar | 1.53 | 172.7 | 248 | 1.39 | Hepatic cyst<br>Multiple thyroid nodules (TI-RADS3)<br>Bilateral carotid intima-media thickening and plaque formation<br>Fatty liver; Hepatic cyst; Conform to the sonogram of cholecystitis; Silty gallstone                                                          |
| 10002287 | male | 77 | teacher | 10001207 | 6.3 | 1.48 | 0.56 | 87 | 3.56 | 85 | Increased $\epsilon$ | 5.24 | 76.9 | 16.24 | 4.51 | 3.830 | 26.6, overv | 92.13  | 155 | No | The size ar | 1.46 | 170.1 | 245 | 1.81 | Thyroid nodules (TI-RADS3)<br>Bilateral carotid intima-media thickening and plaque formation<br>Fatty liver                                                                                                                                                            |
| 10002287 | male | 77 | teacher | 10002287 | 6.3 | 1.24 | 1.24 | 93 | 4.91 | 75 | Elevated bl          | 5.64 | 77.8 | 16.49 | 4.39 | 4.950 | 26.8, overv | 63.55  | 173 | No | After parti | 1.01 | 170.3 | 365 | 3.23 | After partial thyroidectomy; Thyroid nodules (TI-RADS3)<br>Bilateral carotid intima-media thickening and plaque formation<br>Fatty liver; Right renal cyst                                                                                                             |
| 10002287 | male | 76 | teacher | 10001207 | 6.3 | 1.03 | 1.76 | 66 | 3.30 | 77 | Normal bl            | 5.72 | 96.1 | 21.31 | 5.46 | 1.150 | 31.1, obesi | 148.30 | 129 | No | The size ar | 1.92 | 175.8 | 356 | 1.50 | Thyroid nodules (TI-RADS3)<br>Bilateral carotid intima-media thickening and plaque formation<br>Fatty liver; Hepatic cyst; Double renal cyst                                                                                                                           |
| 10002288 | male | 80 | teacher | 10001207 | 7.4 | 1.11 | 4.19 | 84 | 5.20 | 79 | Increased $\epsilon$ | 5.03 | 62.8 | 20.21 | 5.39 | 1.590 | 23.4, norm  | 122.50 | 163 | No | The size ar | 1.73 | 163.7 | 536 | 2.66 | Thyroid nodules (TI-RADS3)<br>Bilateral carotid intima-media thickening and plaque formation<br>Fatty liver; Hepatic cyst; Right renal cyst; Left renal fluid dark area (considering the possibility of hydronephrosis, excluding pyelogenic cysts); Left kidney stone |
| 10002288 | male | 76 | teacher | 10001207 | 6.8 | 1.00 | 1.76 | 88 | 4.94 | 88 | Increased $\epsilon$ | 6.04 | 69.8 | 17.96 | 5.26 | 0.884 | 23.4, norm  | 107.60 | 189 | No | The size ar | 1.81 | 172.7 | 323 | 3.23 | Multiple thyroid nodules (TI-RADS3)<br>Bilateral carotid intima-media thickening and plaque formation<br>Fatty liver                                                                                                                                                   |
| 10002288 | male | 71 | teacher | 10001207 | 7.3 | 1.61 | 1.69 | 85 | 5.62 | 92 | Increased $\epsilon$ | 7.83 | 95.6 | 14.14 | 4.28 | 2.050 | 30.4, obesi | 56.98  | 141 | No | The size ar | 1.11 | 177.3 | 374 | 3.25 | Thyroid nodules (TI-RADS3)<br>Bilateral carotid intima-media thickening and left plaque formation                                                                                                                                                                      |

|                  |    |         |              |      |      |     |      |    |                           |      |       |      |       |                     |     |    |                             |       |     |      |                                                                                                                                                                                                                                                                                                                                                                                                                                                                                                                                                |
|------------------|----|---------|--------------|------|------|-----|------|----|---------------------------|------|-------|------|-------|---------------------|-----|----|-----------------------------|-------|-----|------|------------------------------------------------------------------------------------------------------------------------------------------------------------------------------------------------------------------------------------------------------------------------------------------------------------------------------------------------------------------------------------------------------------------------------------------------------------------------------------------------------------------------------------------------|
| 10002288C male   | 64 | teacher | 10001207€6.0 | 1.01 | 2.71 | 65  | 4.93 | 60 | Normal blc6.30            | 69.9 | 17.63 | 4.69 | 1.960 | 23.1, norm 85.16    | 108 | No | The size ar 1.16            | 173.9 | 321 | 2.86 | No obvious abnormal ultrasonographic changes are found in liver, gallbladder, pancreas, spleen and kidneys<br>Multiple thyroid nodules (TI-RADS3)<br>Bilateral carotid intima-media thickening and plaque formation<br>No obvious abnormal ultrasonographic changes are found in liver, gallbladder, pancreas, spleen and kidneys                                                                                                                                                                                                              |
| 10002288C female | 66 | teacher | 1000120786   |      |      | 70  |      | 76 | Normal blood pressur 58.4 |      |       |      |       | 22.4, normal weight | 106 | No | The size and shape of 161.6 |       |     |      | Thyroid nodules (TI-RADS3)<br>Bilateral mammary glands without obvious abnormality<br>Postmenopausal uterus<br>Bilateral carotid intima-media thickening and plaque formation<br>Fatty liver;Strong echo in gallbladder (considering the possibility of sediment stone);Recheck recommended<br>Thyroid nodules (TI-RADS3);Periodic review is recommended<br>Bilateral mammary gland hyperplasia;Periodic review is recommended<br>Bilateral carotid intima-media thickening and plaque formation<br>Fatty liver;Hepatic cyst;Double renal cyst |
| 10002288C female | 64 | teacher | 10002288C5.5 | 1.18 | 0.98 | 63  | 2.64 | 71 | Increased €5.33           | 55.2 | 17.23 | 5.24 | 3.510 | 20.9, norm 118.90   | 143 | No | The size ar 1.87            | 162.6 | 373 | 1.09 | Thyroid nodules (M: TI-RADS4a, other nodules TI-RADS3);It is recommended to have contrast-enhanced ultrasound examination or further specialized examination when necessary<br>Bilateral carotid intima-media thickening and plaque formation                                                                                                                                                                                                                                                                                                  |
| 10002288C male   | 71 | teacher | 10001207€5.8 | 1.44 | 0.44 | 101 | 3.89 | 65 | Elevated bl4.19           | 77   | 19.32 | 4.32 | 1.820 | 26. Overwe 83.78    | 150 | No | The size ar 0.88            | 172   | 308 | 2.16 | Thyroid nodules (M: TI-RADS4a, other nodules TI-RADS3);It is recommended to have contrast-enhanced ultrasound examination or further specialized examination when necessary<br>Bilateral carotid intima-media thickening and plaque formation                                                                                                                                                                                                                                                                                                  |

|           |        |    |         |           |     |      |      |    |      |    |           |     |      |      |       |      |       |             |        |     |    |             |      |       |     |      |                                                                                                                                                                                                                                                                         |
|-----------|--------|----|---------|-----------|-----|------|------|----|------|----|-----------|-----|------|------|-------|------|-------|-------------|--------|-----|----|-------------|------|-------|-----|------|-------------------------------------------------------------------------------------------------------------------------------------------------------------------------------------------------------------------------------------------------------------------------|
| 10002288C | male   | 67 | teacher | 10002288C | 5.6 | 1.41 | 0.95 | 69 | 5.18 | 96 | Normal    | blc | 4.71 | 68.1 | 18.66 | 4.90 | 1.180 | 23.4, norm  | 85.46  | 120 | No | The size ar | 1.39 | 170.7 | 381 | 3.29 | No obvious abnormal ultrasonographic changes are found in liver, gallbladder, pancreas, spleen and kidneys<br>Left lobe nodule of thyroid (TI-RADS3)<br>Bilateral carotid intima-media thickening and plaque formation<br>Fatty liver; Prompt: cholecystitis; Gallstone |
| 10002288C | male   | 78 | teacher | 10001207C | 6.1 | 1.20 | 2.09 | 82 | 5.36 | 71 | Increased | ε   | 4.83 | 68.1 | 14.25 | 4.67 | 7.290 | 25.9, overv | 87.53  | 152 | No | After most  | 1.54 | 162.3 | 303 | 3.39 | After most thyroid operations; Residual thyroid gland nodules (TI-RADS3)<br>Bilateral carotid intima-media thickening and right plaque formation<br>Fatty liver                                                                                                         |
| 100022881 | male   | 65 | teacher | 10001207C | 5.6 | 1.40 | 0.81 | 75 | 5.10 | 67 | Normal    | blc | 5.19 | 88.5 | 17.92 | 5.07 | 2.130 | 27.3, overv | 92.40  | 117 | No | The size ar | 1.50 | 180.2 | 326 | 3.25 | Multiple thyroid nodules (TI-RADS3)<br>Bilateral carotid intima-media thickening and right plaque formation<br>Right renal cyst<br>Multiple thyroid nodules (TI-RADS3)                                                                                                  |
| 100022881 | male   | 65 | teacher | 10001207C | 5.5 | 1.08 | 0.99 | 75 | 3.28 | 76 | Increased | ε   | 4.64 | 82.5 | 19.37 | 5.18 | 1.720 | 26.4, overv | 91.30  | 140 | No | The size ar | 1.42 | 176.7 | 369 | 1.84 | Bilateral carotid intima-media thickening and left plaque formation<br>Left renal cyst;<br>Left renal cyst;<br>After partial thyroidectomy; Left lobe nodule of thyroid (TI-RADS3);                                                                                     |
| 10002034E | female | 54 | teacher | 10000027C | 5.6 | 2.02 | 0.60 | 63 | 4.11 | 72 | Normal    | blc | 4.24 | 50.2 | 17.37 | 4.86 | 2.940 | 18.6, norm  | 117.80 | 111 | No | The patien  | 1.76 | 164.1 | 266 | 1.92 | Bilateral mammary glands without obvious abnormality<br>Postmenopausal uterus; fibroid;<br>Bilateral carotid intima-media thickening<br>Fatty liver; Low echo at splenic hilum (consider the possibility of accessory spleen)                                           |
| 10002034C | male   | 52 | teacher | 10000262C | 5.4 | 0.76 | 2.13 | 75 | 3.61 | 73 | Normal    | blc | 4.90 | 99.7 | 16.91 | 4.16 | 2.550 | 32.5, obesi | 115.60 | 123 | No | The size ar | 1.37 | 175.1 | 435 | 2.07 | No obvious abnormal ultrasonographic changes of thyroid<br>Bilateral carotid intima-media thickening<br>Fatty liver; Hepatic cyst                                                                                                                                       |
| 10002034C | male   | 55 | teacher | 10000027C | 5.8 | 1.47 | 0.98 | 62 | 5.30 | 68 | Normal    | blc | 4.70 | 78.4 | 13.04 | 5.03 | 1.870 | 27.6, overv | 109.40 | 106 | No | The size ar | 2.13 | 168.5 | 359 | 3.30 | Thyroid nodules (TI-RADS2)<br>Bilateral carotid intima-media thickening and plaque formation<br>Fatty liver; Hepatic cyst; Splenomegaly                                                                                                                                 |
| 10002034C | male   | 55 | teacher | 10000027C | 5.5 | 0.78 | 1.29 | 63 | 3.22 | 59 | Normal    | blc | 5.92 | 75.9 | 16.77 | 5.16 | 0.906 | 26.4, overv | 108.90 | 113 | No | The size ar | 1.62 | 169.6 | 484 | 1.91 | Left lobe nodule of thyroid (TI-RADS3)<br>Bilateral carotid intima-media thickening and right plaque formation                                                                                                                                                          |

|          |        |    |         |          |     |      |      |    |      |    |           |     |      |      |       |      |       |             |        |     |    |             |      |       |     |      |                                                                                                                                                                                                                                                                                                                                                                                                                                                                                                                                                                                                          |
|----------|--------|----|---------|----------|-----|------|------|----|------|----|-----------|-----|------|------|-------|------|-------|-------------|--------|-----|----|-------------|------|-------|-----|------|----------------------------------------------------------------------------------------------------------------------------------------------------------------------------------------------------------------------------------------------------------------------------------------------------------------------------------------------------------------------------------------------------------------------------------------------------------------------------------------------------------------------------------------------------------------------------------------------------------|
| 10002036 | male   | 58 | teacher | 10001207 | 6.0 | 1.22 | 1.43 | 77 | 4.99 | 59 | Normal    | blc | 5.19 | 75.7 | 16.85 | 4.74 | 1.130 | 27.8, overv | 81.51  | 135 | No | The size ar | 1.49 | 165   | 416 | 3.14 | Fatty liver<br>No obvious<br>abnormal<br>ultrasonographic<br>changes of thyroid<br>Bilateral carotid<br>intima-media<br>thickening<br>Liver, gallbladder,<br>pancreas, spleen and<br>kidneys have no<br>obvious abnormal<br>ultrasonographic<br>changes                                                                                                                                                                                                                                                                                                                                                  |
| 10002233 | male   | 90 | teacher | 10000028 | 6.3 | 1.15 | 2.01 |    | 4.50 |    |           |     | 6.28 |      | 14.03 | 3.93 | 1.920 |             | 85.85  |     | No | The size ar | 1.28 |       | 314 | 2.55 | Multiple thyroid<br>nodules (TI-RADS3)<br>Bilateral carotid<br>intima-media<br>thickening and<br>plaque formation<br>suggest that the<br>right internal carotid<br>artery is occluded<br>Hepatic<br>cyst;Polypoid lesion<br>of gallbladder<br>Multiple thyroid<br>nodules (TI-RADS3)                                                                                                                                                                                                                                                                                                                     |
| 10002233 | female | 90 | teacher | 10000028 | 6.9 | 1.07 | 1.05 | 77 | 3.63 | 79 | Increased | ε   | 4.91 | 46.9 | 15.35 | 4.45 | 1.610 | 19.8, norm  | 101.60 | 154 | No | The size ar | 1.53 | 153.9 | 276 | 2.09 | Bilateral mammary<br>glands without<br>obvious abnormality<br>Bilateral carotid<br>intima-media<br>thickening and<br>plaque formation<br>Hepatic cyst;Right<br>renal cyst;Bilateral<br>hydronephrosis;Pleas<br>e combine with the<br>clinic and suggest<br>further examination<br>if necessary                                                                                                                                                                                                                                                                                                           |
| 10002018 | male   | 95 | teacher | 10000028 | 5.7 | 1.05 | 0.64 | 66 | 4.26 | 71 | Increased | ε   | 5.05 | 72.6 | 16.30 | 4.51 | 1.930 | 25, overwe  | 114.60 | 152 | No | The size ar | 1.70 | 170.4 | 269 | 2.87 | Thyroid nodules (TI-<br>RADS3)<br>Bilateral carotid<br>intima-media<br>thickening and<br>plaque formation<br>Hepatic cyst<br>Nodule of right<br>thyroid lobe (TI-<br>RADS3)<br>Bilateral carotid<br>intima-media<br>thickening and<br>plaque<br>formation;Stenosis at<br>the bifurcation of the<br>right common<br>carotid artery and<br>the origin of the<br>right external carotid<br>artery (50% -<br>69%);Stenosis of left<br>external carotid<br>artery (70% -<br>99%);Left common<br>carotid artery<br>bifurcation stenosis<br>(less than<br>50%);Occlusion of<br>right internal carotid<br>artery |
| 10002107 | male   | 86 | teacher | 10000027 | 5.6 | 1.16 | 1.05 | 74 | 3.98 | 71 | Increased | ε   | 5.04 | 80.9 | 15.41 | 4.89 | 1.990 | 26.5, overv | 107.90 | 141 | No | The size ar | 1.98 | 174.6 | 310 | 2.22 |                                                                                                                                                                                                                                                                                                                                                                                                                                                                                                                                                                                                          |

|           |        |    |         |              |     |      |      |    |      |     |                               |      |       |      |       |             |        |     |    |             |      |       |     |      |                                                                                                                                                                                                                                                                                                                                                                                                                                                                                                                      |
|-----------|--------|----|---------|--------------|-----|------|------|----|------|-----|-------------------------------|------|-------|------|-------|-------------|--------|-----|----|-------------|------|-------|-----|------|----------------------------------------------------------------------------------------------------------------------------------------------------------------------------------------------------------------------------------------------------------------------------------------------------------------------------------------------------------------------------------------------------------------------------------------------------------------------------------------------------------------------|
| 100020551 | male   | 46 | teacher | 600012652    | 5.1 | 1.17 | 1.13 | 55 | 4.52 | 90  | Diastolic h <sub>y</sub> 5.22 | 64.5 | 19.45 | 4.90 | 1.660 | 22.6, norm  | 148.10 | 102 | No | Thyroid vo  | 1.87 | 169.1 | 356 | 2.84 | Fatty liver<br>Diffuse thyroid disease (combined with thyroid function examination is recommended)<br>Bilateral carotid arteries without obvious abnormality<br>Fatty liver;Hepatic cyst;Double renal cyst<br>Thyroid inhomogeneity change (it is recommended to combine thyroid function examination);Thyroid nodules (TI-RADS3)<br>Bilateral carotid intima-media thickening and plaque formation<br>Fatty liver;Hepatic cyst                                                                                      |
| 100020874 | male   | 87 | teacher | 1804090116.0 |     | 0.88 | 1.66 | 66 | 4.12 | 54  | Increased ε6.13               | 78.1 | 18.42 | 4.99 | 2.110 | 31.2, obesi | 114.00 | 148 | No | The size ar | 1.52 | 158.1 | 297 | 2.58 | Thyroid nodules (TI-RADS3)<br>Bilateral carotid intima-media thickening and plaque formation<br>Fatty liver;Hepatic cyst                                                                                                                                                                                                                                                                                                                                                                                             |
| 100020887 | male   | 67 | teacher | 100002652    | 5.7 | 0.90 | 0.88 | 69 | 4.26 | 68  | Normal blc5.08                | 84   | 12.06 | 4.57 | 2.240 | 29.4, obesi | 62.71  | 128 | No | The size ar | 1.62 | 169.1 | 297 | 2.77 | Thyroid nodules (TI-RADS3)<br>Bilateral carotid intima-media thickening and plaque formation<br>Fatty liver;Hepatic cyst;Polypoid lesion of gallbladder;Gallstone<br>;Left renal calcification<br>No obvious abnormal ultrasonographic changes of thyroid<br>Hyperplasia of bilateral mammary glands<br>Bilateral carotid intima-media thickening<br>Fatty liver<br>Multiple thyroid nodules (TI-RADS3, M nodules suggest close observation)<br>Bilateral carotid intima-media thickening and right plaque formation |
| 100020887 | female | 59 | teacher | 1000002876.2 |     | 1.92 | 1.30 |    | 6.94 |     | 4.55                          |      | 16.23 | 4.47 | 1.260 |             | 86.23  |     | No | The size ar | 1.63 |       | 343 | 4.42 | No obvious abnormal ultrasonographic changes of thyroid<br>Hyperplasia of bilateral mammary glands<br>Bilateral carotid intima-media thickening<br>Fatty liver<br>Multiple thyroid nodules (TI-RADS3, M nodules suggest close observation)<br>Bilateral carotid intima-media thickening and right plaque formation                                                                                                                                                                                                   |
| 100020887 | male   | 55 | teacher | 1000208876.2 |     | 1.67 | 2.36 | 86 | 4.93 | 107 | Increased ε7.43               | 87.5 | 17.41 | 4.79 | 1.400 | 29.4, obesi | 87.74  | 156 | No |             | 1.61 | 172.4 | 378 | 2.58 | Fatty liver;Hepatic cyst<br>No obvious abnormal ultrasonographic changes of thyroid<br>Bilateral carotid intima-media thickening and right plaque formation                                                                                                                                                                                                                                                                                                                                                          |
| 100020887 | male   | 57 | teacher | 1000002880   |     |      |      |    |      |     |                               |      |       |      |       |             |        |     | No |             |      |       |     |      | Fatty liver;Hepatic cyst<br>No obvious abnormal ultrasonographic changes of thyroid<br>Bilateral carotid intima-media thickening and right plaque formation                                                                                                                                                                                                                                                                                                                                                          |
| 100020887 | male   | 64 | teacher | 100012075    | 5.9 | 1.08 | 0.71 | 84 | 3.43 | 76  | Normal blc5.80                | 74.1 | 16.65 | 5.46 | 2.450 | 23.9, norm  | 110.00 | 133 | No | The size ar | 2.03 | 175.9 | 336 | 1.96 | Fatty liver;Hepatic cyst;Gallstone<br>Thyroid nodules (TI-RADS2)<br>Bilateral carotid intima-media thickening and plaque formation                                                                                                                                                                                                                                                                                                                                                                                   |
| 100020892 | male   | 83 | teacher | 1000002715.3 |     | 1.07 | 0.69 | 54 | 2.89 | 82  | Diastolic h <sub>y</sub> 4.33 | 69.2 | 12.86 | 4.14 | 5.430 | 24.6, overv | 74.04  | 123 | No | The size ar | 1.45 | 167.8 | 287 | 1.55 | Fatty liver;Hepatic cyst<br>No obvious abnormal ultrasonographic changes of thyroid<br>Bilateral carotid intima-media thickening and right plaque formation                                                                                                                                                                                                                                                                                                                                                          |



|           |        |    |         |           |     |      |      |    |      |    |            |       |      |       |      |        |             |             |      |     |             |                                                                                                                                                                                 |       |     |      |                                                                                                                                                                                               |
|-----------|--------|----|---------|-----------|-----|------|------|----|------|----|------------|-------|------|-------|------|--------|-------------|-------------|------|-----|-------------|---------------------------------------------------------------------------------------------------------------------------------------------------------------------------------|-------|-----|------|-----------------------------------------------------------------------------------------------------------------------------------------------------------------------------------------------|
| 100020892 | male   | 96 | teacher | 100000270 | 6.3 | 1.05 | 1.61 |    | 3.34 |    | 4.75       | 19.55 | 4.02 | 1.580 |      | 125.40 | No          | The size ar | 1.76 | 234 | 1.65        | Left renal cyst<br>Multiple thyroid nodules (TI-RADS3)<br>Bilateral carotid intima-media thickening and plaque formation<br>After cholecystectomy<br>Thyroid nodules (TI-RADS3) |       |     |      |                                                                                                                                                                                               |
| 100020892 | female | 52 | teacher | 100002625 | 5.7 | 2.23 | 0.72 | 60 | 5.03 | 59 | Normal blc | 5.09  | 50.4 | 16.23 | 3.60 | 1.440  | 18.6, norm  | 104.80      | 104  | No  | The size ar | 1.36                                                                                                                                                                            | 164.7 | 226 | 2.58 | Bilateral mammary gland hyperplasia;Right breast nodule (BI-RADS3)<br>Bilateral carotid intima-media thickening<br>Fatty liver;Hepatic cyst;Double renal cyst<br>Underaverage echo of thyroid |
| 100020892 | male   | 56 | teacher | 100002625 | 5.2 | 0.86 | 2.03 | 74 | 3.64 | 87 | Normal blc | 3.97  | 72.9 | 18.83 | 4.61 | 1.380  | 25.3, overv | 123.60      | 111  | No  | Thyroid vo  | 1.90                                                                                                                                                                            | 169.7 | 516 | 2.04 | Bilateral carotid intima-media thickening and plaque formation<br>Fatty liver;After cholecystectomy;Left renal cyst                                                                           |
| 100020892 | male   | 79 | teacher | 100000271 | 6.4 | 1.33 | 0.68 | 80 | 2.28 | 76 | Normal blc | 5.97  | 74.2 | 16.95 | 4.82 | 2.450  | 26.6, overv | 104.80      | 130  | No  | The size ar | 1.78                                                                                                                                                                            | 167   | 531 | 0.73 | Thyroid nodules (TI-RADS3)<br>Bilateral carotid intima-media thickening and plaque formation<br>Intrahepatic strong echo (considering the possibility of hemangioma)                          |
| 100020845 | female | 58 | teacher | 100000281 | 5.7 | 1.53 | 1.12 | 70 | 5.40 | 69 | Normal blc | 5.15  | 63.8 | 14.51 | 4.10 | 0.768  | 24.3, overv | 89.16       | 116  | No  | The size ar | 1.59                                                                                                                                                                            | 162.2 | 238 | 3.19 | Thyroid nodules (TI-RADS3)<br>Hyperplasia of bilateral mammary glands<br>Postmenopausal uterus                                                                                                |
| 100020845 | male   | 56 | teacher | 100000281 | 5.7 | 1.78 | 1.10 | 68 | 5.96 | 76 | Normal blc | 4.51  | 72.5 | 15.66 | 5.02 | 1.390  | 22. Norma   | 69.00       | 108  | No  | The size ar | 1.38                                                                                                                                                                            | 181.7 | 413 | 3.41 | Bilateral carotid intima-media thickening<br>No obvious abnormal ultrasonographic changes are found in liver, gallbladder, spleen and kidneys                                                 |
| 100020845 | male   | 62 | teacher | 100000282 | 6.2 | 0.86 | 1.19 | 70 | 4.46 | 75 | Normal blc | 6.03  | 76.6 | 16.18 | 4.83 | 2.670  | 26. Overwe  | 76.52       | 117  | No  | The size ar | 1.83                                                                                                                                                                            | 171.7 | 395 | 2.99 | No obvious abnormal ultrasonographic changes of thyroid<br>Bilateral carotid intima-media thickening<br>Fatty liver;Hepatic cyst                                                              |
|           |        |    |         |           |     |      |      |    |      |    |            |       |      |       |      |        |             |             |      |     |             |                                                                                                                                                                                 |       |     |      | No obvious abnormal ultrasonographic changes of thyroid<br>Bilateral carotid intima-media thickening and right plaque formation                                                               |

|          |        |    |         |           |     |      |      |     |      |    |          |     |      |      |       |      |       |             |        |     |    |             |      |       |     |      |                                                                                                                                                                                                                                                                                                          |
|----------|--------|----|---------|-----------|-----|------|------|-----|------|----|----------|-----|------|------|-------|------|-------|-------------|--------|-----|----|-------------|------|-------|-----|------|----------------------------------------------------------------------------------------------------------------------------------------------------------------------------------------------------------------------------------------------------------------------------------------------------------|
| 10002084 | female | 53 | teacher | 100000282 | 5.4 | 1.36 | 1.01 | 70  | 5.55 | 99 | Normal   | blc | 4.44 | 52.4 | 14.10 | 5.62 | 3.460 | 20.9, norm  | 86.44  | 135 | No | The size ar | 1.68 | 158.5 | 284 | 3.76 | Hepatic cyst<br>Thyroid nodules (TI-RADS3)<br>Postmenopausal uterus;Low echo of uterine myometrium (considering the possibility of myoma)<br>Bilateral carotid intima-media thickening<br>Hepatic cyst                                                                                                   |
| 10002084 | female | 59 | teacher | 100000282 | 6.2 | 1.53 | 1.97 | 61  | 6.57 | 82 | Normal   | blc | 4.49 | 56.9 | 19.26 | 4.32 | 1.990 | 22.5, norm  | 90.67  | 113 | No | The size ar | 1.11 | 159.1 | 233 | 4.03 | Thyroid nodules (TI-RADS3)<br>Hyperplasia of bilateral mammary glands<br>Postmenopausal uterus;fibroid<br>Bilateral carotid intima-media thickening<br>Low echo in liver (considering the possibility of hemangioma, it is recommended to conduct contrast-enhanced ultrasound examination if necessary) |
| 10002084 | female | 57 | teacher | 100000282 | 5.7 | 1.67 | 0.87 | 61  | 4.59 | 50 | Normal   | blc | 4.36 | 68.8 | 16.66 | 4.54 | 5.810 | 22.3, norm  | 92.72  | 100 | No | The size ar | 1.31 | 175.6 | 300 | 2.73 | Thyroid nodules (TI-RADS3)<br>Hyperplasia of bilateral mammary glands<br>After adenomyosis surgery<br>Bilateral carotid intima-media thickening and plaque formation<br>Fatty liver                                                                                                                      |
| 10002084 | male   | 51 | teacher | 100000282 | 5.8 | 1.16 | 2.03 | 102 | 4.09 | 71 | Elevated | bl  | 4.96 | 90.9 | 15.23 | 4.97 | 1.430 | 30.2, obesi | 81.30  | 147 | No | The size ar | 1.56 | 173.4 | 345 | 2.25 | Thyroid nodules (TI-RADS2)<br>Bilateral carotid intima-media thickening<br>Fatty liver;Hepatic cyst;Relatively strong echo in the right kidney (considering the possibility of hamartoma)                                                                                                                |
| 10002084 | female | 60 | teacher | 100012072 | 5.5 | 1.11 | 1.27 | 73  | 3.98 | 83 | Normal   | blc | 3.72 | 76.8 | 18.63 | 5.74 | 2.700 | 28. Obesity | 124.40 | 125 | No | The size ar | 2.13 | 165.7 | 255 | 2.23 | Thyroid nodules (TI-RADS3)<br>Hyperplasia of bilateral mammary glands<br>Postmenopausal uterus<br>Bilateral carotid intima-media thickening                                                                                                                                                              |

|          |        |    |         |           |     |      |      |     |      |    |                               |      |       |      |       |             |        |     |    |                                                                                                                                         |      |       |     |      |                                                                                                                                                                                                                                                                           |
|----------|--------|----|---------|-----------|-----|------|------|-----|------|----|-------------------------------|------|-------|------|-------|-------------|--------|-----|----|-----------------------------------------------------------------------------------------------------------------------------------------|------|-------|-----|------|---------------------------------------------------------------------------------------------------------------------------------------------------------------------------------------------------------------------------------------------------------------------------|
| 10002084 | male   | 59 | teacher | 100000282 | 5.6 | 1.09 | 1.41 | 100 | 4.00 | 67 | Elevated bl4.31               | 97.8 | 15.92 | 5.32 | 0.686 | 30.5, obesi | 96.96  | 175 | No | The size ar                                                                                                                             | 1.85 | 179.2 | 341 | 2.18 | Fatty liver<br>Thyroid nodules (MTI-RADS4a and other nodules TI-RADS3);It is recommended to observe closely, recheck regularly, and perform contrast-enhanced ultrasound examination if necessary<br>Bilateral carotid intima-media thickening and right plaque formation |
| 10002084 | female | 57 | teacher | 100000282 | 5.8 | 1.59 | 0.67 | 59  | 4.39 | 58 | Diastolic h <sub>y</sub> 5.53 | 62.8 | 25.22 | 4.89 | 0.066 | 22.9, norm  | 120.90 | 107 | No | After thyroidectomy, no obvious abnormal mass was found in the thyroid bed area. CDFI: no obvious abnormal blood flow signal was found. | 2.04 | 165.5 | 238 | 2.34 | Fatty liver<br>After thyroidectomy<br>Bilateral mammary gland hyperplasia;Right breast nodule (BI-RADS3)<br>Postmenopausal uterus<br>Bilateral carotid arteries without obvious abnormality                                                                               |
| 10002084 | male   | 64 | teacher | 100000282 | 6.7 | 1.11 | 0.80 | 70  | 6.06 | 69 | Normal blc6.30                | 70.3 | 16.81 | 4.22 | 1.760 | 23.1, norm  | 107.10 | 111 | No | The size ar                                                                                                                             | 1.84 | 174.6 | 281 | 4.21 | No obvious abnormal ultrasonographic changes are found in liver, gallbladder, pancreas, spleen and kidneys<br>Thyroid nodules (TI-RADS3)<br>Bilateral carotid intima-media thickening and plaque formation<br>Fatty liver                                                 |
| 10002085 | male   | 55 | teacher | 100000282 | 6.0 | 1.16 | 1.06 | 102 | 5.40 | 90 | Elevated bl4.72               | 75.5 | 18.68 | 4.52 | 1.440 | 27.2, overv | 103.30 | 149 | No | The size ar                                                                                                                             | 1.75 | 166.6 | 445 | 3.58 | Thyroid nodules (TI-RADS3)<br>Bilateral carotid intima-media thickening and plaque formation<br>Fatty liver                                                                                                                                                               |
| 10002085 | female | 57 | teacher | 100000282 | 5.4 | 1.72 | 0.92 | 60  | 5.45 | 78 | Normal blc4.19                | 64.6 | 15.95 | 5.01 | 3.110 | 24.1, overv | 96.97  | 108 | No | The size ar                                                                                                                             | 2.09 | 163.8 | 341 | 3.21 | Thyroid nodules (TI-RADS3)<br>Bilateral mammary gland hyperplasia;LeftHigh echo in fat layer of lateral thorax (considering the possibility of lipoma)<br>Postmenopausal uterus;fibroid<br>Bilateral carotid arteries without obvious abnormality                         |

|           |        |    |         |           |     |      |      |    |      |    |           |     |      |      |       |      |       |             |        |     |    |             |      |       |     |      |                                                                                                                                                                                                                                                                                                                                                                                                                                                                             |
|-----------|--------|----|---------|-----------|-----|------|------|----|------|----|-----------|-----|------|------|-------|------|-------|-------------|--------|-----|----|-------------|------|-------|-----|------|-----------------------------------------------------------------------------------------------------------------------------------------------------------------------------------------------------------------------------------------------------------------------------------------------------------------------------------------------------------------------------------------------------------------------------------------------------------------------------|
| 100020850 | female | 60 | teacher | 100000285 | 5.9 | 1.54 | 1.84 | 66 | 5.56 | 74 | Normal    | blc | 4.97 | 57.7 | 18.55 | 4.47 | 1.650 | 22.1, norm  | 84.81  | 106 | No | Thyroid gl  | 1.52 | 161.4 | 377 | 2.88 | No obvious abnormal ultrasonographic changes are found in liver, gallbladder, pancreas, spleen and kidneys<br>No obvious abnormal ultrasonographic changes of thyroid<br>Hyperplasia of bilateral mammary glands<br>Postmenopausal uterus<br>Bilateral carotid intima-media thickening and left plaque formation;Low echo in left neck (considering lymph nodes)<br>Fatty liver<br>Thyroid inhomogeneity change (it is recommended to combine thyroid function examination) |
| 100020851 | male   | 51 | teacher | 100000285 | 5.9 | 1.65 | 2.13 | 79 | 6.64 | 56 | Normal    | blc | 5.55 | 86.6 | 18.93 | 5.22 | 4.040 | 27.7, overv | 64.57  | 132 | No | The size ar | 1.49 | 176.8 | 475 | 4.23 | Bilateral carotid intima-media thickening and plaque formation<br>Right renal cyst;The left kidney is slightly hyperechoic (considering the possibility of hamartoma)<br>Thyroid inhomogeneity change (it is recommended to combine thyroid function examination);Thyroid nodules (TI-RADS3)                                                                                                                                                                                |
| 100020852 | male   | 65 | teacher | 100000285 | 5.5 | 1.16 | 0.58 | 80 | 4.20 | 77 | Normal    | blc | 5.18 | 71.8 | 20.26 | 4.83 | 1.110 | 22.2, norm  | 108.00 | 132 | No | The thyroic | 2.09 | 179.9 | 172 | 2.56 | Bilateral carotid intima-media thickening and plaque formation<br>Fatty liver<br>Thyroid nodules (TI-RADS2)                                                                                                                                                                                                                                                                                                                                                                 |
| 100020853 | male   | 65 | teacher | 100000285 | 6.3 | 1.04 | 0.58 | 78 | 2.95 | 63 | Increased | ε   | 4.95 | 83.9 | 16.89 | 4.47 | 1.960 | 26.8, overv | 84.90  | 142 | No | The size ar | 1.91 | 177.1 | 337 | 1.51 | Bilateral carotid intima-media thickening and plaque formation<br>Intrahepatic calcification;Left renal cyst<br>Thyroid nodules (TI-RADS2)                                                                                                                                                                                                                                                                                                                                  |
| 100020854 | male   | 87 | teacher | 100000285 | 6.3 | 1.64 | 1.20 |    | 4.93 |    |           |     | 5.49 |      | 13.32 | 4.53 | 3.760 |             | 85.67  |     | No | The size ar | 1.32 |       | 552 | 2.68 | Bilateral carotid intima-media thickening and plaque formation                                                                                                                                                                                                                                                                                                                                                                                                              |

|                 |    |         |              |      |      |    |      |    |                |      |       |      |       |             |        |     |    |             |      |       |     |      |                                                                                                                                                                                                                                                                                                                                                                                                                                                                                                                                                                                                                                                                                                                                                                                                                                                                                                                                                                                                                                                                                                                                                                          |
|-----------------|----|---------|--------------|------|------|----|------|----|----------------|------|-------|------|-------|-------------|--------|-----|----|-------------|------|-------|-----|------|--------------------------------------------------------------------------------------------------------------------------------------------------------------------------------------------------------------------------------------------------------------------------------------------------------------------------------------------------------------------------------------------------------------------------------------------------------------------------------------------------------------------------------------------------------------------------------------------------------------------------------------------------------------------------------------------------------------------------------------------------------------------------------------------------------------------------------------------------------------------------------------------------------------------------------------------------------------------------------------------------------------------------------------------------------------------------------------------------------------------------------------------------------------------------|
| 100020851male   | 56 | teacher | 100002636.3  | 0.88 | 2.19 | 80 | 2.97 | 78 | Normal blc5.11 | 69.1 | 16.96 | 4.70 | 1.410 | 23.5, norm  | 83.62  | 129 | No | The size ar | 1.92 | 171.4 | 364 | 1.28 | After cholecystectomy;Hepatic cyst;Intrahepatic calcification;It is suggested that the right kidney is heterotopic; Multiple thyroid nodules (TI-RADS3) Bilateral carotid intima-media thickening Fatty liver;Hepatic cyst;Polypoid lesion of gallbladder Thyroid nodules (TI-RADS3);Nodule at the lower pole of the right thyroid lobe, observation recommended Bilateral carotid intima-media thickening and plaque formation Fatty liver Diffuse thyroid disease (combined with thyroid function examination is recommended) Bilateral carotid arteries without obvious abnormality Fatty liver;Hepatic cyst;Left renal cyst Left lobe nodule of thyroid (TI-RADS3) Bilateral carotid intima-media thickening and plaque formation No obvious abnormal ultrasonographic changes are found in liver, gallbladder, pancreas, spleen and kidneys Heterogeneous echo of thyroid Hyperplasia of bilateral mammary glands IUD;Low echo of uterine myometrium (considering the possibility of uterine myoma) Bilateral carotid intima-media thickening Hepatic cyst Multiple thyroid nodules (TI-RADS3) Bilateral carotid intima-media thickening and right plaque formation |
| 100020851male   | 52 | teacher | 100002636.9  | 1.00 | 1.80 | 82 | 4.50 | 74 | Normal blc5.47 | 89.2 | 19.96 | 4.14 | 1.920 | 30.1, obesi | 32.87  | 126 | No |             | 1.07 | 172.2 | 364 | 2.69 |                                                                                                                                                                                                                                                                                                                                                                                                                                                                                                                                                                                                                                                                                                                                                                                                                                                                                                                                                                                                                                                                                                                                                                          |
| 100020851male   | 48 | teacher | 1000013515.3 | 1.23 | 2.21 | 81 | 5.03 | 97 | Normal blc5.11 | 67.4 | 23.93 | 5.15 | 1.310 | 25.2, overv | 117.30 | 122 | No | The size ar | 1.78 | 163.6 | 351 | 3.08 |                                                                                                                                                                                                                                                                                                                                                                                                                                                                                                                                                                                                                                                                                                                                                                                                                                                                                                                                                                                                                                                                                                                                                                          |
| 100020851male   | 58 | teacher | 100002636.9  | 0.85 | 2.01 | 89 | 5.52 | 69 | Normal blc5.13 | 81.5 | 17.88 | 5.25 | 3.750 | 27.2, overv | 106.60 | 124 | No | The size ar | 1.78 | 173.1 | 352 | 3.57 |                                                                                                                                                                                                                                                                                                                                                                                                                                                                                                                                                                                                                                                                                                                                                                                                                                                                                                                                                                                                                                                                                                                                                                          |
| 100020851female | 51 | teacher | 100012074.6  | 1.25 | 1.81 | 60 | 4.54 | 66 | Normal blc5.21 | 52.9 | 17.43 | 4.32 | 2.030 | 18.9, norm  | 88.13  | 100 | No | The size ar | 1.82 | 167.3 | 177 | 2.34 |                                                                                                                                                                                                                                                                                                                                                                                                                                                                                                                                                                                                                                                                                                                                                                                                                                                                                                                                                                                                                                                                                                                                                                          |
| 100020851male   | 56 | teacher | 100002636.0  | 0.89 | 1.32 | 66 | 4.74 | 65 | Normal blc3.94 | 69.8 | 20.66 | 5.34 | 1.440 | 23.6, norm  | 96.20  | 108 | No | The size ar | 2.17 | 171.9 | 411 | 3.04 |                                                                                                                                                                                                                                                                                                                                                                                                                                                                                                                                                                                                                                                                                                                                                                                                                                                                                                                                                                                                                                                                                                                                                                          |

|           |        |    |         |              |      |      |     |      |    |                 |      |       |      |       |             |        |     |    |                                                                                                                                                                                                                                         |      |       |     |      |                                                                                                                                                                                                                                                                                                                                                         |
|-----------|--------|----|---------|--------------|------|------|-----|------|----|-----------------|------|-------|------|-------|-------------|--------|-----|----|-----------------------------------------------------------------------------------------------------------------------------------------------------------------------------------------------------------------------------------------|------|-------|-----|------|---------------------------------------------------------------------------------------------------------------------------------------------------------------------------------------------------------------------------------------------------------------------------------------------------------------------------------------------------------|
| 100020851 | female | 58 | teacher | 1000208516.0 | 1.38 | 1.08 | 62  | 5.48 | 58 | Normal blc4.80  | 52.2 | 16.33 | 4.34 | 2.340 | 20.3, norm  | 92.67  | 110 | No | The size and shape of the thyroid gland can be seen. A low echo nodule about 3x2mm in size can be seen in the right lobe of the thyroid gland. The boundary is clear, and the internal echo is not homogenous. CDFI: The internal blood | 1.93 | 160.5 | 322 | 3.41 | No obvious abnormal ultrasonographic changes are found in liver, gallbladder, pancreas, spleen and kidneys<br>Thyroid nodules (TI-RADS3);Thyroid echo is not homogeneous<br>Bilateral mammary gland hyperplasia;Bilateral breast nodules (BI-RADS3)<br>Postmenopausal uterus;fibroid<br>Local thickening of carotid intima-media                        |
| 100020852 | male   | 50 | teacher | 1000208525.5 | 0.83 | 1.50 | 98  | 2.91 | 68 | Elevated di4.73 | 89.7 | 19.95 | 5.38 | 2.760 | 29.8, obesi | 115.30 | 139 | No | The size ar                                                                                                                                                                                                                             | 2.16 | 173.6 | 476 | 1.59 | Fatty liver;Hepatic cyst<br>Thyroid nodules (TI-RADS3)<br>Bilateral carotid intima-media thickening<br>Fatty liver<br>Thyroid nodules (TI-RADS3)<br>Hyperplasia of bilateral mammary glands<br>fibroid<br>Bilateral carotid intima-media thickening and left plaque formation<br>Fatty liver<br>No obvious abnormal ultrasonographic changes of thyroid |
| 100020852 | female | 50 | teacher | 600012635.5  | 1.34 | 0.96 | 70  | 5.82 | 72 | Normal blc5.19  | 61.8 | 17.37 | 4.71 | 0.830 | 23.3, norm  | 110.20 | 121 | No | The size ar                                                                                                                                                                                                                             | 1.95 | 162.8 | 325 | 3.76 | Bilateral carotid intima-media thickening and left plaque formation<br>Fatty liver<br>No obvious abnormal ultrasonographic changes of thyroid                                                                                                                                                                                                           |
| 100020852 | male   | 56 | teacher | 600012625.9  | 1.22 | 3.70 | 73  | 5.70 | 95 | Normal blc4.64  | 79.3 | 19.24 | 6.84 | 1.370 | 26.5, overv | 120.00 | 109 | No | The size ar                                                                                                                                                                                                                             | 2.84 | 173   | 382 | 3.13 | obvious abnormality<br>Fatty liver;Hepatic cyst;Double renal cyst<br>No obvious abnormal ultrasonographic changes of thyroid                                                                                                                                                                                                                            |
| 100020852 | male   | 45 | teacher | 600012635.5  | 1.25 | 0.94 | 83  | 4.79 | 69 | Normal blc4.31  | 84.5 | 17.97 | 5.47 | 1.980 | 28.9, obesi | 104.00 | 124 | No | The size ar                                                                                                                                                                                                                             | 1.82 | 170.9 | 345 | 2.93 | changes of thyroid<br>Bilateral carotid intima-media thickening<br>Heterogeneous fatty liver;Very low echo in liver (considering cyst);Gallstone;Right renal cyst                                                                                                                                                                                       |
| 100020852 | male   | 53 | teacher | 600012796.1  | 1.28 | 0.81 | 105 | 4.11 | 83 | Elevated bl5.90 | 64.9 | 16.74 | 5.64 | 1.250 | 25.7, overv | 96.02  | 159 | No | The size ar                                                                                                                                                                                                                             | 1.88 | 159   | 433 | 2.43 | No obvious abnormal ultrasonographic changes of thyroid<br>Bilateral carotid intima-media thickening                                                                                                                                                                                                                                                    |

|           |        |    |         |           |     |      |      |    |      |    |           |     |      |      |       |      |       |             |        |     |    |             |      |       |     |      |                                                                                                                                                                                                    |
|-----------|--------|----|---------|-----------|-----|------|------|----|------|----|-----------|-----|------|------|-------|------|-------|-------------|--------|-----|----|-------------|------|-------|-----|------|----------------------------------------------------------------------------------------------------------------------------------------------------------------------------------------------------|
| 100020852 | male   | 49 | teacher | 600012655 | 6.0 | 1.14 | 1.70 | 78 | 6.36 | 78 | Normal    | blc | 5.13 | 61.1 | 21.12 | 4.82 | 2.500 | 22.7, norm  | 121.70 | 118 | No | The size ar | 1.59 | 164.2 | 451 | 4.25 | Fatty liver<br>Heterogeneous echo of thyroid (it is recommended to combine thyroid function examination)<br>Bilateral carotid intima-media thickening<br>Fatty liver<br>Thyroid nodules (TI-RADS3) |
| 100020852 | male   | 51 | teacher | 600012626 | 6.4 | 1.07 | 1.15 | 83 | 4.45 | 66 | Normal    | blc | 6.44 | 76.5 | 17.62 | 5.19 | 1.110 | 26.8, overv | 97.22  | 139 | No | The size ar | 1.61 | 168.9 | 411 | 2.72 | Bilateral carotid intima-media thickening and left plaque formation<br>Fatty liver<br>Multiple thyroid nodules (TI-RADS3)                                                                          |
| 100020852 | male   | 59 | teacher | 100020852 | 5.4 | 1.13 | 1.76 | 87 | 4.33 | 59 | Normal    | blc | 4.49 | 84.8 | 19.79 | 6.10 | 1.390 | 29. Obesity | 86.35  | 137 | No | The size ar | 1.74 | 170.9 | 379 | 2.53 | Bilateral carotid intima-media thickening and plaque formation<br>Fatty liver<br>No obvious abnormal ultrasonographic changes of thyroid                                                           |
| 100020852 | male   | 44 | teacher | 600012631 | 5.6 | 1.06 | 1.92 | 78 | 3.96 | 77 | Normal    | blc | 4.80 | 91.9 | 20.16 | 6.44 | 4.880 | 30.6, obesi | 82.08  | 121 | No | The size ar | 2.18 | 173.4 | 438 | 2.16 | Bilateral carotid arteries without obvious abnormality<br>Fatty liver<br>Thyroid nodules (TI-RADS3)                                                                                                |
| 100020852 | female | 52 | teacher | 600012706 | 6.1 | 1.56 | 1.36 | 81 | 5.58 | 77 | Normal    | blc | 5.16 | 70.4 | 14.95 | 4.02 | 2.670 | 23.8, norm  | 91.10  | 123 | No | The size ar | 1.86 | 171.9 | 309 | 3.27 | Hyperplasia of bilateral mammary glands<br>Postmenopausal uterus;<br>Bilateral carotid intima-media thickening<br>Fatty liver;Hepatic cyst;Left kidney stone with hydronephrosis                   |
| 100020853 | male   | 55 | teacher | 600012626 | 6.2 | 1.33 | 0.95 | 94 | 5.57 | 74 | Elevated  | bl  | 6.00 | 84.4 | 20.91 | 5.10 | 1.010 | 25.8, overv | 103.70 | 142 | No | The size ar | 1.83 | 180.8 | 408 | 3.60 | Thyroid nodules (TI-RADS3)<br>Bilateral carotid arteries without obvious abnormality<br>Fatty liver                                                                                                |
| 100020853 | male   | 56 | teacher | 600012626 | 6.4 | 1.24 | 2.09 | 88 | 5.21 | 92 | Increased | ε   | 5.37 | 85.3 | 16.47 | 5.29 | 1.610 | 27.7, overv | 92.70  | 141 | No | The size ar | 1.68 | 175.4 | 425 | 3.00 | Thyroid nodules (TI-RADS3)<br>Bilateral carotid intima-media thickening and left plaque formation<br>Hepatic cyst<br>No obvious abnormal ultrasonographic changes of thyroid                       |
| 100020853 | male   | 46 | teacher | 600012621 | 5.5 | 1.28 | 1.45 | 71 | 5.39 | 71 | Normal    | blc | 4.85 | 57.6 | 18.82 | 4.81 | 1.110 | 20.3, norm  | 92.21  | 121 | No | The size ar | 1.75 | 168.5 | 224 | 3.32 | Bilateral carotid arteries without obvious abnormality                                                                                                                                             |

|           |        |    |         |           |     |      |      |    |      |    |           |      |      |       |       |       |            |             |        |     |             |              |       |       |      |                                                                                                                                                                                                                                                                                    |                                                                                                                                                                                                                                                                                                     |
|-----------|--------|----|---------|-----------|-----|------|------|----|------|----|-----------|------|------|-------|-------|-------|------------|-------------|--------|-----|-------------|--------------|-------|-------|------|------------------------------------------------------------------------------------------------------------------------------------------------------------------------------------------------------------------------------------------------------------------------------------|-----------------------------------------------------------------------------------------------------------------------------------------------------------------------------------------------------------------------------------------------------------------------------------------------------|
| 100020855 | female | 60 | teacher | 100020855 | 6.5 | 1.18 | 1.79 | 76 | 5.47 | 66 | Increased | 5.76 | 74.7 | 11.85 | 4.95  | 2.420 | 27.4, over | 75.11       | 147    | No  | The size ar | 2.08         | 165.2 | 310   | 3.29 | Fatty liver;The left kidney is slightly hyperechoic (considering the possibility of hamartoma) No obvious abnormal ultrasonographic changes of thyroid Hyperplasia of bilateral mammary glands Postmenopausal uterus;fibroid Bilateral carotid intima-media thickening Fatty liver |                                                                                                                                                                                                                                                                                                     |
| 100020855 | male   | 50 | teacher | 600012640 | 6.0 | 0.71 | 9.02 | 69 | 3.96 | 85 | Normal    | blc  | 5.65 | 66.6  | 19.39 | 5.21  | 1.130      | 23.2, norm  | 100.30 | 101 | No          | After thyro  | 1.65  | 169.6 | 370  | 1.04                                                                                                                                                                                                                                                                               | After thyroidectomy Bilateral carotid arteries without obvious abnormality Intrahepatic hyperechogenicity (considering the possibility of hemangioma, it is recommended to conduct contrast-enhanced ultrasound examination if necessary);Hepatic cyst                                              |
| 100020855 | female | 51 | teacher | 600012640 | 5.7 | 1.94 | 0.61 | 64 | 4.84 | 60 | Normal    | blc  | 4.62 | 45.4  | 18.74 | 3.61  | 1.670      | 18.4, norm  | 130.90 | 110 | No          | The size ar  | 1.73  | 156.9 | 178  | 2.81                                                                                                                                                                                                                                                                               | Thyroid nodules (TI-RADS3) Bilateral mammary gland hyperplasia;Bilateral breast nodules (BI-RADS3) fibroid Bilateral carotid intima-media thickening No obvious abnormal ultrasonographic changes are found in liver, gallbladder, pancreas, spleen and kidneys                                     |
| 100020855 | female | 57 | teacher | 600012640 | 6.0 | 2.04 | 1.38 | 80 | 6.62 | 71 | Normal    | blc  | 4.42 | 50.4  | 15.15 | 3.60  | 0.381      | 20.4, norm  | 91.97  | 137 | No          | After the ri | 1.49  | 157   | 308  | 3.78                                                                                                                                                                                                                                                                               | Post operation of right thyroid lobe;Residual left lobe thyroid nodule (TI-RADS3) Hyperplasia of bilateral mammary glands Postmenopausal uterus Bilateral carotid intima-media thickening Fatty liver;Polypoid lesion of gallbladder Multiple thyroid nodules (TI-RADS3), reexamination recommended |
| 100020855 | male   | 54 | teacher | 600012614 | 6.0 | 1.04 | 2.93 | 92 | 4.49 | 65 | Elevated  | bl   | 4.35 | 84.7  | 17.79 | 4.67  | 2.420      | 29.1, obesi | 106.40 | 153 | No          | The size ar  | 2.21  | 170.7 | 499  | 2.29                                                                                                                                                                                                                                                                               | Bilateral carotid intima-media thickening                                                                                                                                                                                                                                                           |



|           |        |    |         |           |     |      |      |    |      |    |           |         |      |       |      |       |             |       |     |    |             |      |       |     |      |                                                                                                                                                                                                                                                                                                                                |
|-----------|--------|----|---------|-----------|-----|------|------|----|------|----|-----------|---------|------|-------|------|-------|-------------|-------|-----|----|-------------|------|-------|-----|------|--------------------------------------------------------------------------------------------------------------------------------------------------------------------------------------------------------------------------------------------------------------------------------------------------------------------------------|
| 100020855 | male   | 51 | teacher | 600012624 | 6.0 | 1.05 | 1.90 | 85 | 5.00 | 70 | Increased | 5.39    | 75.8 | 18.50 | 5.09 | 1.150 | 26.9, overv | 87.49 | 141 | No | The size ar | 2.12 | 168   | 331 | 2.99 | Fatty liver;Hepatic cyst<br>Nodule of right thyroid lobe (TI-RADS3)<br>Bilateral carotid intima-media thickening and plaque formation<br>Hepatic cyst;Intrahepatic calcification                                                                                                                                               |
| 100020854 | female | 53 | teacher | 600012652 | 6.0 | 2.31 | 0.81 | 68 | 5.06 | 75 | Normal    | blc4.69 | 62.4 | 14.07 | 4.51 | 5.750 | 23.8, norm  | 91.45 | 106 | No | The size ar | 2.07 | 162   | 265 | 2.48 | Thyroid nodules (TI-RADS3)<br>Hyperplasia of bilateral mammary glands<br>Bilateral carotid intima-media thickening<br>Fatty liver;Intrahepatic hyperechogenicity (considering the possibility of hemangioma, it is recommended to conduct contrast-enhanced ultrasound examination if necessary)                               |
| 100020854 | female | 50 | teacher | 600012612 | 6.3 | 0.93 | 1.91 | 66 | 4.85 | 96 | Normal    | blc6.53 | 59.2 | 18.21 | 4.35 | 1.850 | 25.3, overv | 91.50 | 108 | No | The size ar | 1.74 | 153   | 322 | 3.00 | Thyroid nodules (TI-RADS3)<br>Bilateral mammary gland hyperplasia;LeftLater al breast nodule (BI-RADS3)<br>Hysteromyoma (multiple)<br>Bilateral carotid arteries without obvious abnormality<br>Hepatic cyst<br>Diffuse thyroid disease (combined with thyroid function examination is recommended);Thyroid nodules (TI-RADS3) |
| 100020854 | female | 47 | teacher | 600012657 | 5.3 | 1.66 | 1.62 | 73 | 6.42 | 92 | Normal    | blc4.07 | 65.3 | 14.23 | 3.69 | 1.180 | 23. Norma   | 75.92 | 118 | No | The thyroic | 1.55 | 168.6 | 231 | 3.71 | Hyperplasia of bilateral mammary glands<br>No obvious abnormality is found in uterine appendages<br>Bilateral carotid arteries without obvious abnormality                                                                                                                                                                     |

|           |        |    |         |           |     |      |      |    |      |    |             |      |      |       |      |       |             |        |     |    |             |      |       |     |      |                                                                                                                                                                                                                                                                                                                                                                                                                                               |
|-----------|--------|----|---------|-----------|-----|------|------|----|------|----|-------------|------|------|-------|------|-------|-------------|--------|-----|----|-------------|------|-------|-----|------|-----------------------------------------------------------------------------------------------------------------------------------------------------------------------------------------------------------------------------------------------------------------------------------------------------------------------------------------------------------------------------------------------------------------------------------------------|
| 100020854 | female | 52 | teacher | 600012612 | 5.9 | 1.45 | 1.14 | 61 | 5.21 | 73 | Normal blc  | 5.08 | 58.1 | 16.02 | 5.16 | 1.670 | 22.6, norm  | 87.80  | 99  | No | The size ar | 1.71 | 160.4 | 300 | 3.11 | No obvious abnormal ultrasonographic changes are found in liver, gallbladder, pancreas, spleen and kidneys<br>Multiple thyroid nodules (TI-RADS2)<br>Bilateral mammary gland hyperplasia;Bilateral breast nodules (BI-RADS3)<br>Postmenopausal uterus<br>Bilateral carotid arteries without obvious abnormality<br>Fatty liver;Hepatic cyst;Polypoid lesion of gallbladder<br>Thyroid nodule (TI-RADS3), regular reexamination is recommended |
| 100020854 | female | 58 | teacher | 600012632 | 5.5 | 0.85 | 2.52 | 80 | 4.56 | 82 | Normal blc  | 4.71 | 64.4 | 17.84 | 5.43 | 1.940 | 24.9, overv | 105.40 | 126 | No | The size ar | 1.81 | 160.8 | 331 | 2.60 | Hyperplasia of bilateral mammary glands<br>After hysterectomy<br>Bilateral carotid intima-media thickening and plaque formation<br>Gallstone;Left renal cyst                                                                                                                                                                                                                                                                                  |
| 100020854 | male   | 57 | teacher | 600012621 | 5.2 | 1.04 | 2.06 | 64 | 4.37 | 71 | Normal blc  | 4.41 | 66.5 | 16.01 | 4.50 | 3.500 | 23.3, norm  | 90.40  | 124 | No | The size ar | 1.72 | 168.9 | 316 | 2.51 | No obvious abnormal ultrasonographic changes of thyroid<br>Bilateral carotid intima-media thickening<br>No obvious abnormal ultrasonographic changes are found in liver, gallbladder, pancreas, spleen and kidneys                                                                                                                                                                                                                            |
| 100020854 | male   | 59 | teacher | 600012612 | 5.8 | 1.43 | 1.20 | 96 | 5.98 | 75 | Elevated bl | 4.37 | 74.4 | 17.84 | 4.29 | 7.650 | 24.6, overv | 99.20  | 161 | No | The size ar | 1.65 | 174   | 464 | 3.80 | No obvious abnormal ultrasonographic changes of thyroid<br>Bilateral carotid intima-media thickening and plaque formation<br>Fatty liver                                                                                                                                                                                                                                                                                                      |
| 100020854 | female | 53 | teacher | 600012647 | 6.4 | 1.18 | 3.51 | 65 | 5.43 | 78 | Normal blc  | 5.47 | 69   | 16.72 | 4.16 | 3.110 | 26. Overwe  | 92.42  | 109 | No | The size ar | 1.62 | 162.9 | 330 | 2.67 | Thyroid nodules (TI-RADS3)<br>Hyperplasia of bilateral mammary glands<br>Intrauterine device<br>Bilateral carotid intima-media thickening<br>Fatty liver;Hepatic cyst                                                                                                                                                                                                                                                                         |
| 100020854 | male   | 58 | teacher | 600012612 | 5.4 | 1.16 | 1.84 | 87 | 3.39 | 79 | Normal blc  | 5.09 | 86.3 | 21.13 | 5.14 | 1.300 | 29.7, obesi | 103.00 | 122 | No | The size ar | 2.25 | 170.6 | 451 | 1.58 | Thyroid nodules (TI-RADS3)<br>Bilateral carotid intima-media thickening and left plaque formation                                                                                                                                                                                                                                                                                                                                             |

|          |        |    |         |          |      |      |      |      |      |       |             |       |       |       |            |       |             |        |                                                                                                                                                                                                                                                                                                                                                                                                                       |    |             |      |       |     |      |                                                                                                                                                                                                                                                                                                                                                                                                        |
|----------|--------|----|---------|----------|------|------|------|------|------|-------|-------------|-------|-------|-------|------------|-------|-------------|--------|-----------------------------------------------------------------------------------------------------------------------------------------------------------------------------------------------------------------------------------------------------------------------------------------------------------------------------------------------------------------------------------------------------------------------|----|-------------|------|-------|-----|------|--------------------------------------------------------------------------------------------------------------------------------------------------------------------------------------------------------------------------------------------------------------------------------------------------------------------------------------------------------------------------------------------------------|
| 10002085 | female | 54 | teacher | 10002085 | 5.8  | 1.43 | 0.95 | 5.48 | 5.33 | 18.01 | 4.96        | 3.080 | 88.35 | No    | Thyroid gl | 1.76  | 332         | 3.47   | Hepatic cyst;Polypoid lesion of gallbladder;Double renal cyst<br>Heterogeneous echo of thyroid (it is recommended to combine thyroid function examination)<br>Left breast surgery;Hyperplasia of right breast;Right breast nodule (BI-RADS4a);It is recommended to conduct contrast-enhanced ultrasound examination when necessary<br>Postmenopausal uterus<br>Bilateral carotid arteries without obvious abnormality |    |             |      |       |     |      |                                                                                                                                                                                                                                                                                                                                                                                                        |
| 10002085 | female | 47 | teacher | 60001261 | 5.6  | 1.85 | 0.92 | 67   | 5.11 | 76    | Normal blc  | 4.48  | 60.4  | 18.49 | 3.64       | 1.470 | 21.2, norm  | 108.40 | 112                                                                                                                                                                                                                                                                                                                                                                                                                   | No | The size ar | 1.66 | 168.8 | 335 | 2.68 | The right kidney is slightly hyperechoic (considering the possibility of hamartoma);Right renal cyst<br>Nodule of right thyroid lobe (TI-RADS3)<br>Bilateral mammary gland hyperplasia;LeftLater al breast nodule (BI-RADS3)<br>IUD;fibroid<br>Bilateral carotid intima-media thickening<br>No obvious abnormal ultrasonographic changes are found in liver, gallbladder, pancreas, spleen and kidneys |
| 10002085 | female | 50 | teacher | 18052501 | 16.1 | 1.39 | 0.84 | 94   | 5.48 | 97    | Elevated bl | 5.34  | 64.7  | 16.56 | 5.32       | 3.700 | 24.5, overv | 107.30 | 160                                                                                                                                                                                                                                                                                                                                                                                                                   | No | The size ar | 2.43 | 162.5 | 294 | 3.42 | Thyroid nodules (TI-RADS2)<br>Bilateral carotid intima-media thickening and plaque formation<br>Fatty liver;No echo in spleen (possible cyst considered)<br>Thyroid nodules (TI-RADS3)<br>Bilateral carotid intima-media thickening and right plaque formation                                                                                                                                         |
| 10002085 | male   | 56 | teacher | 60001262 | 5.7  | 1.43 | 1.19 | 84   | 5.00 | 86    | Normal blc  | 4.49  | 72.3  | 19.24 | 5.20       | 0.899 | 24.9, overv | 102.20 | 125                                                                                                                                                                                                                                                                                                                                                                                                                   | No | The size ar | 1.73 | 170.3 | 329 | 2.94 |                                                                                                                                                                                                                                                                                                                                                                                                        |
| 10002085 | male   | 55 | teacher | 10002085 | 5.5  | 0.66 | 2.23 | 99   | 3.12 | 65    | Elevated bl | 4.61  | 78.6  | 19.45 | 5.14       | 1.710 | 27.7, overv | 107.20 | 160                                                                                                                                                                                                                                                                                                                                                                                                                   | No | The size ar | 2.01 | 168.4 | 458 | 1.65 |                                                                                                                                                                                                                                                                                                                                                                                                        |

|           |      |    |         |           |     |      |      |    |      |    |             |      |       |       |       |       |            |        |     |             |             |       |       |      |                                                                                                                                                 |                                                                                                                                                                                                                                                                                                                                                     |
|-----------|------|----|---------|-----------|-----|------|------|----|------|----|-------------|------|-------|-------|-------|-------|------------|--------|-----|-------------|-------------|-------|-------|------|-------------------------------------------------------------------------------------------------------------------------------------------------|-----------------------------------------------------------------------------------------------------------------------------------------------------------------------------------------------------------------------------------------------------------------------------------------------------------------------------------------------------|
| 100020855 | male | 52 | teacher | 100020855 | 5.3 | 1.20 | 0.61 | 95 | 3.56 | 85 | Elevated bl | 5.09 | 71.3  | 16.33 | 5.66  | 1.590 | 22.6, norm | 98.97  | 146 | No          | The size ar | 2.02  | 177.5 | 325  | 2.09                                                                                                                                            | No obvious abnormal ultrasonographic changes are found in liver, gallbladder, pancreas, spleen and kidneys<br>Multiple thyroid nodules (TI-RADS3)<br>Bilateral carotid intima-media thickening<br>Accord with chronic liver disease<br>sonogram;Portal vein dilatation;Secondary changes of gallbladder                                             |
| 100020855 | male | 60 | teacher | 100020855 | 9.0 | 1.21 | 0.79 |    | 3.75 |    | 11.22       |      | 21.83 | 3.66  | 1.790 |       | 87.96      |        | No  | The size ar | 1.35        |       | 335   | 2.20 | Multiple thyroid nodules (TI-RADS3)<br>Bilateral carotid intima-media thickening and plaque formation<br>Fatty liver;Intrahepatic calcification |                                                                                                                                                                                                                                                                                                                                                     |
| 100020855 | male | 51 | teacher | 600012622 | 5.9 | 1.66 | 1.37 | 56 | 5.72 | 63 | Diastolic h | 5.04 | 64.8  | 17.05 | 5.87  | 2.730 | 22.2, norm | 102.30 | 104 | No          | The size ar | 2.12  | 170.8 | 337  | 3.49                                                                                                                                            | Thyroid nodules (TI-RADS3)<br>Bilateral carotid intima-media thickening<br>Polypoid lesion of gallbladder                                                                                                                                                                                                                                           |
| 100020855 | male | 52 | teacher | 100020855 | 5.9 | 1.50 | 1.83 | 81 | 5.36 | 73 | Normal blc  | 4.05 | 69.8  | 19.37 | 5.48  | 4.140 | 24. Overwe | 112.50 | 129 | No          | The size ar | 2.20  | 170.4 | 332  | 3.06                                                                                                                                            | No obvious abnormal ultrasonographic changes of thyroid<br>Bilateral carotid arteries without obvious abnormality<br>Fatty liver;Hepatic cyst;Gallstone                                                                                                                                                                                             |
| 100020855 | male | 55 | teacher | 100020855 | 5.6 | 1.10 | 1.13 | 75 | 4.80 | 90 | Normal blc  | 3.93 | 68.7  | 19.04 | 5.36  | 1.450 | 23.4, norm | 98.68  | 119 | No          | The size ar | 2.05  | 171.4 | 444  | 3.08                                                                                                                                            | Multiple thyroid nodules (TI-RADS3)<br>Bilateral carotid intima-media thickening and right plaque formation<br>Fatty liver;Left renal cyst<br>Left lobe nodule of thyroid (TI-RADS4b);Thyroid right lobar nodule (TI-RADS3);It is recommended to conduct contrast-enhanced ultrasound examination or ultrasound-guided needle biopsy when necessary |
| 100020855 | male | 56 | teacher | 100020855 | 6.0 | 1.00 | 2.89 | 78 | 5.58 | 88 | Normal blc  | 5.42 | 68.7  | 20.05 | 5.06  | 0.851 | 23.4, norm | 99.24  | 124 | No          | 1.63        | 171.3 | 394   | 3.25 | Bilateral carotid arteries without obvious abnormality                                                                                          |                                                                                                                                                                                                                                                                                                                                                     |

|           |        |    |         |           |     |      |      |    |      |    |             |         |      |       |      |        |             |        |     |    |                                                                                                                                         |      |       |     |      |                                                                                                                                                                                                                                                                                                                                                                                                                                                                                                                                                                                                                                                        |
|-----------|--------|----|---------|-----------|-----|------|------|----|------|----|-------------|---------|------|-------|------|--------|-------------|--------|-----|----|-----------------------------------------------------------------------------------------------------------------------------------------|------|-------|-----|------|--------------------------------------------------------------------------------------------------------------------------------------------------------------------------------------------------------------------------------------------------------------------------------------------------------------------------------------------------------------------------------------------------------------------------------------------------------------------------------------------------------------------------------------------------------------------------------------------------------------------------------------------------------|
| 100020856 | male   | 59 | teacher | 100020856 | 6.2 | 1.68 | 0.52 | 78 | 4.15 | 66 | Normal      | blc4.73 | 72.7 | 16.09 | 4.14 | 3.970  | 27. Overwe  | 87.52  | 123 | No | The size ar                                                                                                                             | 1.56 | 164   | 347 | 2.09 | No obvious abnormal ultrasonographic changes are found in liver, gallbladder, pancreas, spleen and kidneys<br>Thyroid isthmus nodule (TI-RADS3)<br>Bilateral carotid intima-media thickening                                                                                                                                                                                                                                                                                                                                                                                                                                                           |
| 100020856 | male   | 50 | teacher | 100020856 | 6.1 | 0.87 | 2.18 | 91 | 4.18 | 68 | Elevated di | 4.04    | 83   | 23.04 | 4.96 | 17.790 | 26.5, overv | 118.60 | 123 | No | After thyroidectomy, no obvious abnormal mass was found in the thyroid bed area. CDFI: no obvious abnormal blood flow signal was found. | 1.80 | 177   | 371 | 2.49 | Fatty liver;Hepatic cyst<br>Double kidney cyst<br>After thyroidectomy<br>Bilateral carotid intima-media thickening and left plaque formation                                                                                                                                                                                                                                                                                                                                                                                                                                                                                                           |
| 100020856 | male   | 54 | teacher | 100020856 | 5.6 | 1.63 | 0.45 | 76 | 3.53 | 76 | Normal      | blc4.71 | 76.8 | 13.65 | 5.32 | 1.460  | 24.2, overv | 78.55  | 116 | No | The size ar                                                                                                                             | 1.91 | 178   | 242 | 1.72 | Polypoid lesion of gallbladder<br>Thyroid nodules (TI-RADS3);Lobular hypoechoic area on the right side of thyroid,<br>reexamination recommended<br>Bilateral carotid intima-media thickening<br>Hepatic cyst<br>No obvious abnormal ultrasonographic changes of thyroid<br>Bilateral mammary glands without obvious abnormality<br>Postmenopausal uterus;Uterine myoma with calcification;<br>Bilateral carotid intima-media thickening and plaque formation<br>Fatty liver;The left kidney is slightly hyperechoic (considering the possibility of hamartoma);<br>Diffuse thyroid disease (combined with thyroid function examination is recommended) |
| 100021112 | female | 70 | teacher | 100012076 | 5.7 | 1.88 | 1.01 | 87 | 4.73 | 54 | Increased s | 4.85    | 41.8 | 17.09 | 4.80 | 2.910  | 21. Norma   | 100.20 | 183 | No | The size ar                                                                                                                             | 1.54 | 141.1 | 183 | 2.70 | Postmenopausal uterus;Uterine myoma with calcification;<br>Bilateral carotid intima-media thickening and plaque formation<br>Fatty liver;The left kidney is slightly hyperechoic (considering the possibility of hamartoma);<br>Diffuse thyroid disease (combined with thyroid function examination is recommended)                                                                                                                                                                                                                                                                                                                                    |
| 100021112 | female | 66 | teacher | 100002826 | 6.4 | 1.18 | 2.45 | 71 | 7.32 | 74 | Normal      | blc7.05 | 67.5 | 12.74 | 4.30 | 3.340  | 27.1, overv | 86.53  | 122 | No | The thickn                                                                                                                              | 1.80 | 157.8 | 381 | 5.03 | Hyperplasia of bilateral mammary glands<br>Postmenopausal uterus;fibroid;<br>Bilateral carotid intima-media thickening and plaque formation                                                                                                                                                                                                                                                                                                                                                                                                                                                                                                            |

|           |        |    |         |           |     |      |      |     |      |    |             |      |      |       |      |       |             |        |     |    |             |      |       |     |      |                                                                                                                                                                                                                                                                                         |
|-----------|--------|----|---------|-----------|-----|------|------|-----|------|----|-------------|------|------|-------|------|-------|-------------|--------|-----|----|-------------|------|-------|-----|------|-----------------------------------------------------------------------------------------------------------------------------------------------------------------------------------------------------------------------------------------------------------------------------------------|
| 100021113 | female | 61 | teacher | 100000266 | 5.9 | 1.36 | 0.83 | 100 | 3.68 | 81 | Elevated di | 4.73 | 62.1 | 20.21 | 4.08 | 1.870 | 24.5, overv | 80.71  | 135 | No | The size ar | 0.93 | 159.3 | 298 | 2.10 | Hepatic cyst;Polypoid lesion of gallbladder; Multiple thyroid nodules (TI-RADS3) Bilateral mammary glands without obvious abnormality Postmenopausal uterus Bilateral carotid intima-media thickening No obvious abnormal ultrasonographic changes are found in                         |
| 100021113 | male   | 81 | teacher | 100000266 | 6.0 | 0.94 | 1.37 | 76  | 3.48 | 83 | Increased ε | 5.54 | 72.4 | 13.37 | 4.06 | 1.770 | 22.3, norm  | 75.26  | 142 | No | The size ar | 1.53 | 180.3 | 379 | 1.87 | liver, gallbladder, pancreas, spleen and kidneys Multiple thyroid nodules (TI-RADS3) Bilateral carotid intima-media thickening and plaque formation Hepatic cyst;Left renal cyst                                                                                                        |
| 100021410 | male   | 92 | teacher | 100000273 | 5.7 | 1.64 | 0.81 | 56  | 5.37 | 67 | Abnormal    | 4.52 | 62   | 17.88 | 2.71 | 0.518 | 18.7, norm  | 132.30 | 158 | No | The size ar | 1.03 | 182   | 260 | 3.13 | Thyroid nodules (TI-RADS3) Bilateral carotid intima-media thickening and plaque formation Fatty liver;Intrahepatic hypoechogenicity (considering the possibility of hemangioma, including heterogeneous fatty liver, contrast-enhanced ultrasound is recommended);Right renal cyst;     |
| 100022330 | female | 67 | teacher | 100002633 | 7.0 | 1.56 | 1.39 | 72  | 6.29 | 74 | Normal blc  | 6.39 | 64.8 | 16.24 | 4.55 | 3.390 | 24.6, overv | 110.30 | 129 | No | The size ar | 1.68 | 162.2 | 382 | 4.20 | No obvious abnormal ultrasonographic changes of thyroid gland Bilateral mammary gland hyperplasia;Bilateral breast nodules (BI-RADS3);Local mammary duct dilatation in both breasts;It is recommended to conduct short-term review and further inspection Fatty liver;Double renal cyst |
| 100022394 | male   | 55 | teacher | 100012080 | 6.6 | 0.71 | 7.69 | 114 | 3.80 | 68 | Elevated bl | 8.15 | 82.9 | 16.37 | 4.43 | 3.600 | 27.2, overv | 80.75  | 175 | No | The size ar | 1.51 | 174.5 | 441 | 1.21 | No obvious abnormal ultrasonographic changes of thyroid Bilateral carotid intima-media thickening                                                                                                                                                                                       |

|           |        |    |         |          |     |      |      |    |      |    |           |     |      |      |       |      |       |             |        |     |    |                                                                                                                                                                                                                                                       |      |       |     |      |                                                                                                                                                                                                                                                                                                                                                                                                                                                                                                                                                              |
|-----------|--------|----|---------|----------|-----|------|------|----|------|----|-----------|-----|------|------|-------|------|-------|-------------|--------|-----|----|-------------------------------------------------------------------------------------------------------------------------------------------------------------------------------------------------------------------------------------------------------|------|-------|-----|------|--------------------------------------------------------------------------------------------------------------------------------------------------------------------------------------------------------------------------------------------------------------------------------------------------------------------------------------------------------------------------------------------------------------------------------------------------------------------------------------------------------------------------------------------------------------|
| 100022394 | male   | 56 | teacher | 10000020 | 5.9 | 0.93 | 2.27 | 80 | 4.62 | 78 | Normal    | blc | 6.21 | 73.3 | 16.19 | 4.89 | 2.830 | 25.4, overv | 82.15  | 118 | No | The size ar                                                                                                                                                                                                                                           | 1.43 | 170   | 397 | 2.59 | Fatty liver<br>Thyroid echo is not homogeneous (combined with thyroid function examination is recommended)<br>Bilateral carotid intima-media thickening<br>Fatty liver;Polypoid lesion of gallbladder;Right renal cyst;<br>Thyroid inhomogeneity change (it is recommended to combine thyroid function examination);Multiple thyroid nodules (TI-RADS3);<br>Bilateral carotid intima-media thickening<br>Fatty liver;Polypoid lesion of gallbladder<br>Multiple thyroid nodules (TI-RADS3)<br>Bilateral carotid intima-media thickening and plaque formation |
| 100022395 | male   | 63 | teacher | 10002239 | 5.8 | 1.23 | 0.85 | 83 | 4.95 | 89 | Increased | ε   | 4.61 | 66.5 | 17.42 | 5.31 | 1.130 | 24.3, overv | 84.57  | 144 | No | The size ar                                                                                                                                                                                                                                           | 1.61 | 165.3 | 335 | 2.97 | Fatty liver;Polypoid lesion of gallbladder<br>Multiple thyroid nodules (TI-RADS3)<br>Bilateral carotid intima-media thickening and plaque formation                                                                                                                                                                                                                                                                                                                                                                                                          |
| 100022396 | male   | 60 | teacher | 10002239 | 5.0 | 1.85 | 1.31 | 97 | 5.73 | 69 | Elevated  | bl  | 5.44 | 69   | 19.56 | 5.41 | 1.600 | 24. Overwe  | 96.61  | 164 | No | The size ar                                                                                                                                                                                                                                           | 1.90 | 169.4 | 296 | 3.22 | Fatty liver;Left renal cyst<br>Thyroid inhomogeneity change (it is recommended to combine thyroid function examination);Multiple thyroid nodules (TI-RADS3)<br>Hyperplasia of bilateral mammary glands<br>Bilateral carotid intima-media thickening and plaque formation                                                                                                                                                                                                                                                                                     |
| 100022333 | female | 67 | teacher | 10000028 | 7.0 | 1.59 | 1.08 | 83 | 4.90 | 82 | Increased | ε   | 7.96 | 85.3 | 17.43 | 4.53 | 2.750 | 31.6, obesi | 119.00 | 151 | No | The left lobe of the thyroid gland is enlarged in size and plump in shape, and the right lobe is of fair size and shape. Several nodules echo can be seen in the gland. The larger one is located in the left lobe, which is cystic and solid, mainly | 1.68 | 164.4 | 211 | 2.79 | Fatty liver;Hepatic cyst;Polypoid lesion of gallbladder<br>Multiple thyroid nodules (TI-RADS3)<br>Bilateral carotid intima-media thickening and plaque formation                                                                                                                                                                                                                                                                                                                                                                                             |
| 100022397 | male   | 59 | teacher | 10000028 | 5.5 | 0.98 | 1.75 | 84 | 3.67 | 82 | Increased | ε   | 4.73 | 79   | 15.77 | 5.92 | 1.520 | 26. Overwe  | 86.11  | 156 | No | The size ar                                                                                                                                                                                                                                           | 1.85 | 174.3 | 377 | 1.91 | Fatty liver;Hepatic cyst;Polypoid lesion of gallbladder<br>Multiple thyroid nodules (TI-RADS3)<br>Bilateral carotid intima-media thickening and plaque formation                                                                                                                                                                                                                                                                                                                                                                                             |

|          |        |    |         |          |     |      |      |    |      |    |            |      |      |       |      |       |             |        |     |    |             |       |       |      |                                                                                                                                                                                                                                                                                                                                                                                                                                                                                                                                                                                                                                                                                                                                                                                                                                                                                                                                                                                                                                                                                                                                                                                                                                                                                                            |  |
|----------|--------|----|---------|----------|-----|------|------|----|------|----|------------|------|------|-------|------|-------|-------------|--------|-----|----|-------------|-------|-------|------|------------------------------------------------------------------------------------------------------------------------------------------------------------------------------------------------------------------------------------------------------------------------------------------------------------------------------------------------------------------------------------------------------------------------------------------------------------------------------------------------------------------------------------------------------------------------------------------------------------------------------------------------------------------------------------------------------------------------------------------------------------------------------------------------------------------------------------------------------------------------------------------------------------------------------------------------------------------------------------------------------------------------------------------------------------------------------------------------------------------------------------------------------------------------------------------------------------------------------------------------------------------------------------------------------------|--|
| 10002239 | female | 57 | teacher | 10000028 | 6.1 | 1.46 | 1.59 | 74 | 6.62 | 65 | Normal blc | 5.70 | 64.3 | 17.38 | 4.85 | 2.060 | 22.6, norm  | 104.40 | 114 | No | 1.88        | 168.7 | 295   | 4.23 | Fatty liver;Hepatic cyst;Intrahepatic hyperechogenicity (local fat infiltration may be considered);Left renal cyst<br>Thyroid nodules (M: TI-RADS4a, other nodules: TI-RADS3);It is recommended to conduct contrast-enhanced ultrasound examination when necessary<br>Hyperplasia of bilateral mammary glands<br>Postmenopausal uterus;Strong echo in cervical region, further examination recommended<br>Bilateral carotid intima-media thickening and right plaque formation<br>No obvious abnormal ultrasonographic changes are found in liver, gallbladder, pancreas, spleen and kidneys<br>Diffuse thyroid disease (combined with thyroid function examination is recommended)<br>Bilateral mammary gland hyperplasia;Right breast nodule (BI-RADS3);It is recommended to recheck and conduct contrast-enhanced ultrasound examination if necessary<br>No obvious abnormality is found in uterine appendages<br>Bilateral carotid arteries without Polypoid lesion of gallbladder<br>Multiple thyroid nodules (TI-RADS3)<br>Hyperplasia of bilateral mammary glands<br>Hysteromyoma with myoma calcification<br>Bilateral carotid intima-media thickening and plaque formation<br>Fatty liver<br>No obvious abnormal ultrasonographic changes of thyroid<br>Bilateral carotid intima-media thickening |  |
| 10002239 | female | 52 | teacher | 10000028 | 5.3 | 2.01 | 1.10 | 65 | 5.90 | 76 | Normal blc | 4.81 | 65.6 | 14.22 | 5.22 | 2.180 | 22.5, norm  | 92.11  | 104 | No | The size ar | 1.99  | 170.6 | 235  | 3.22                                                                                                                                                                                                                                                                                                                                                                                                                                                                                                                                                                                                                                                                                                                                                                                                                                                                                                                                                                                                                                                                                                                                                                                                                                                                                                       |  |
| 10002239 | female | 60 | teacher | 10000028 | 6.0 | 2.02 | 0.93 | 62 | 6.16 | 94 | Normal blc | 4.13 | 51.7 | 15.66 | 4.61 | 4.030 | 21.4, norm  | 89.73  | 107 | No | 1.42        | 155.6 | 309   | 3.54 |                                                                                                                                                                                                                                                                                                                                                                                                                                                                                                                                                                                                                                                                                                                                                                                                                                                                                                                                                                                                                                                                                                                                                                                                                                                                                                            |  |
| 10002239 | male   | 48 | teacher | 10000028 | 5.5 | 0.78 | 4.31 | 83 | 5.91 | 72 | Normal blc | 4.96 | 99.1 | 15.43 | 4.88 | 2.640 | 29.3, obesi | 87.66  | 124 | No | The size ar | 1.60  | 184   | 456  | 3.50                                                                                                                                                                                                                                                                                                                                                                                                                                                                                                                                                                                                                                                                                                                                                                                                                                                                                                                                                                                                                                                                                                                                                                                                                                                                                                       |  |



|           |        |    |         |            |     |      |      |    |      |     |             |      |      |       |      |       |             |       |     |    |             |      |       |     |      |                                                                                                                                                                                                       |
|-----------|--------|----|---------|------------|-----|------|------|----|------|-----|-------------|------|------|-------|------|-------|-------------|-------|-----|----|-------------|------|-------|-----|------|-------------------------------------------------------------------------------------------------------------------------------------------------------------------------------------------------------|
| 10002233C | male   | 65 | teacher | 10000028C  | 5.7 | 1.09 | 1.12 | 72 | 3.07 | 73  | Normal blc  | 4.89 | 65.5 | 15.43 | 5.24 | 1.950 | 23.7, norm  | 78.84 | 139 | No | The size ar | 1.67 | 166.1 | 360 | 1.70 | Fatty liver;Intrahepatic calcification; No obvious abnormal ultrasonographic changes of thyroid                                                                                                       |
| 10002233C | male   | 86 | teacher | 1000002815 | 4   | 1.06 | 0.40 | 55 | 2.97 | 72  | Diastolic h | 5.39 | 58.6 | 17.32 | 4.72 | 5.080 | 22.6, norm  | 94.45 | 119 | No | The size ar | 1.35 | 161.2 | 287 | 1.68 | Bilateral carotid intima-media thickening and plaque formation<br>Double renal cyst<br>Diffuse thyroid disease (combined with thyroid function examination is recommended);Thyroid nodules (TI-RADS3) |
| 10002234E | male   | 56 | teacher | 10002067C  | 8.8 | 1.07 | 2.23 | 73 | 4.91 | 87  | Normal blc  | 7.19 | 76.6 | 15.74 | 5.19 | 1.980 | 26.5, overv | 70.54 | 127 | No | The size ar | 1.44 | 170.1 | 233 | 3.12 | Thyroid inhomogeneity change (it is recommended to combine thyroid function examination);Thyroid nodules (TI-RADS2)                                                                                   |
| 100022331 | female | 63 | teacher | 1000002815 | 5   | 1.64 | 0.60 | 55 | 5.65 | 76  | Diastolic h | 4.87 | 47.9 | 19.57 | 4.36 | 1.490 | 18.9, norm  | 80.19 | 113 | No | The size ar | 1.07 | 159.4 | 265 | 3.36 | Bilateral carotid intima-media thickening and right plaque formation<br>Cholesterol crystal of gallbladder;Left renal cyst                                                                            |
| 100022331 | male   | 64 | teacher | 1000002815 | 9   | 1.35 | 1.38 | 93 | 4.86 | 88  | Elevated bl | 5.18 | 87.6 | 15.51 | 4.03 | 2.440 | 30.5, obesi | 82.34 | 146 | No | The size ar | 1.24 | 169.6 | 385 | 3.07 | Multiple thyroid nodules (TI-RADS3)<br>Bilateral carotid intima-media thickening and plaque formation                                                                                                 |
| 100022331 | male   | 63 | teacher | 1000002815 | 7   | 1.14 | 1.52 | 89 | 3.60 | 106 | Normal blc  | 5.94 | 71   | 14.64 | 4.57 | 3.330 | 22.6, norm  | 91.58 | 138 | No | The size ar | 1.56 | 177.3 | 337 | 1.84 | After cholecystectomy;Hepatic cyst<br>Thyroid nodules (TI-RADS2)<br>Bilateral carotid intima-media thickening and plaque formation                                                                    |

|           |        |    |         |              |      |      |    |      |    |             |      |      |       |      |       |             |        |     |    |             |      |       |     |      |                                                                                                                                                                                                                                                                                                                                                                                                                           |
|-----------|--------|----|---------|--------------|------|------|----|------|----|-------------|------|------|-------|------|-------|-------------|--------|-----|----|-------------|------|-------|-----|------|---------------------------------------------------------------------------------------------------------------------------------------------------------------------------------------------------------------------------------------------------------------------------------------------------------------------------------------------------------------------------------------------------------------------------|
| 100022331 | male   | 82 | teacher | 1000120808.2 | 0.79 | 2.20 | 66 | 3.87 | 74 | Increased   | 8.32 | 79.9 | 15.68 | 4.12 | 2.560 | 27.1, over  | 72.13  | 162 | No | The size ar | 1.27 | 171.7 | 243 | 2.29 | Fatty liver<br>Diffuse thyroid disease (combined with thyroid function examination is recommended);Multiple thyroid nodules (TI-RADS3)<br>Bilateral carotid intima-media thickening and plaque formation<br>Double renal cyst<br>Nodule of right thyroid lobe (TI-RADS3)<br>Bilateral carotid intima-media thickening and plaque formation<br>Fatty liver;Hepatic cyst;Polypoid lesion of gallbladder<br>Right renal cyst |
| 100022331 | male   | 80 | teacher | 1000120806.2 | 0.87 | 1.34 | 70 | 3.04 | 76 | Increased   | 5.46 | 86.4 | 14.78 | 4.91 | 0.924 | 28.6, obesi | 100.40 | 145 | No | The size ar | 1.81 | 173.9 | 465 | 1.71 | Thyroid nodules (TI-RADS2)<br>Bilateral carotid intima-media thickening and plaque formation<br>Fatty liver;Hepatic cyst                                                                                                                                                                                                                                                                                                  |
| 100022331 | male   | 77 | teacher | 1000120805.8 | 1.74 | 0.88 | 91 | 4.98 | 80 | Elevated bl | 4.90 | 70.6 | 17.00 | 4.94 | 2.250 | 24.4, over  | 91.75  | 176 | No | The size ar | 1.60 | 170.2 | 370 | 2.74 | Thyroid nodules (TI-RADS2)<br>Bilateral carotid intima-media thickening and plaque formation<br>Fatty liver;Hepatic cyst<br>Thyroid nodules (M: TI-RADS4a, other nodules: TI-RADS3);It is recommended that further examination and, if necessary, contrast-enhanced ultrasound examination be carried out                                                                                                                 |
| 100022331 | male   | 80 | teacher | 1000120815.9 | 1.17 | 1.91 |    | 3.60 |    |             | 6.03 |      | 18.05 | 5.06 | 0.895 |             | 99.65  |     | No |             | 1.61 |       | 349 | 1.88 | Bilateral carotid intima-media thickening and plaque formation<br>Fatty liver;Intrahepatic calcification;Gallstone;Prompt: cholecystitis;Right renal calcification                                                                                                                                                                                                                                                        |
| 100022331 | male   | 83 | teacher | 1000026306.0 | 1.25 | 1.25 | 73 | 4.97 | 76 | Increased   | 5.50 | 83.4 | 14.43 | 4.55 | 2.160 | 26.3, over  | 80.92  | 141 | No | The size ar | 1.64 | 178   | 372 | 3.26 | Thyroid nodules (TI-RADS3, M suggest close observation)<br>Bilateral carotid intima-media thickening and plaque formation<br>Hepatic cyst;Polypoid changes of gallbladder;Periodic review is recommended                                                                                                                                                                                                                  |
| 100022332 | female | 57 | teacher | 1000026315.8 | 1.35 | 1.95 | 92 | 5.55 | 91 | Elevated bl | 5.06 | 61.8 | 16.88 | 4.55 | 5.100 | 26.7, over  | 104.00 | 158 | No | After surge | 1.46 | 152   | 448 | 3.37 | After surgery of right thyroid lobe<br>Bilateral mammary gland hyperplasia;Bilateral breast nodules (BI-RADS3);Periodic review is recommended<br>After hysterectomy<br>Bilateral carotid intima-media thickening                                                                                                                                                                                                          |

|           |        |    |         |           |     |      |      |     |      |    |                  |      |       |      |       |             |        |     |                  |                  |       |                                                                                                                                                                                               |      |                                                                                                                                                                                                                                                          |
|-----------|--------|----|---------|-----------|-----|------|------|-----|------|----|------------------|------|-------|------|-------|-------------|--------|-----|------------------|------------------|-------|-----------------------------------------------------------------------------------------------------------------------------------------------------------------------------------------------|------|----------------------------------------------------------------------------------------------------------------------------------------------------------------------------------------------------------------------------------------------------------|
| 100022332 | male   | 60 | teacher | 100002632 | 6.5 | 1.49 | 1.53 |     | 4.91 |    | 5.79             |      | 13.93 | 5.08 | 0.909 |             | 81.91  | No  | The size ar 1.55 | 271              | 2.77  | Fatty liver<br>Diffuse thyroid disease (combined with thyroid function examination is recommended)<br>Bilateral carotid intima-media thickening<br>Fatty liver;Polypoid lesion of gallbladder |      |                                                                                                                                                                                                                                                          |
| 100022332 | male   | 61 | teacher | 100002630 | 5.4 | 0.93 | 4.29 | 102 | 4.59 | 66 | Elevated bl 4.83 | 80.6 | 17.39 | 6.07 | 3.780 | 29.2, obesi | 108.40 | 161 | No               | The size ar 2.02 | 166.2 | 479                                                                                                                                                                                           | 2.24 | Multiple thyroid nodules (TI-RADS3)<br>Bilateral carotid intima-media thickening and left plaque formation<br>Hepatic cyst<br>Multiple thyroid nodules (TI-RADS2)<br>Bilateral mammary gland hyperplasia;LeftLater al breast nodule (BI-RADS2)           |
| 100022332 | female | 55 | teacher | 100002632 | 5.3 | 1.54 | 0.94 | 84  | 4.82 | 77 | Normal blc 4.12  | 51.4 | 16.75 | 5.06 | 2.320 | 18.7, norm  | 105.30 | 128 | No               | The size ar 1.81 | 166   | 312                                                                                                                                                                                           | 3.00 | Postmenopausal uterus<br>Bilateral carotid arteries without obvious abnormality<br>Fatty liver<br>Nodule of right thyroid lobe (TI-RADS3)                                                                                                                |
| 100022332 | female | 60 | teacher | 100000272 | 5.8 | 1.25 | 2.77 | 81  | 6.58 | 64 | Increased c 4.86 | 64.8 | 12.09 | 4.19 | 2.430 | 26.8, overv | 71.63  | 143 | No               | Thyroid gl 1.43  | 155.4 | 285                                                                                                                                                                                           | 4.33 | Hyperplasia of bilateral mammary glands<br>Postmenopausal uterus;fibroid;Cervical cyst<br>Bilateral carotid intima-media thickening and right plaque formation<br>Fatty liver<br>Thyroid nodules (TI-RADS3)                                              |
| 100022332 | male   | 60 | teacher | 100002630 | 6.1 | 0.90 | 2.08 | 104 | 2.75 | 59 | Elevated bl 5.47 | 67.6 | 17.82 | 5.43 | 1.590 | 24.5, overv | 103.90 | 142 | No               | The size ar 1.88 | 166.2 | 479                                                                                                                                                                                           | 1.30 | Bilateral carotid intima-media thickening and plaque formation;Stenosis at the origin of the right internal carotid artery (less than 50%)<br>No obvious abnormal ultrasonographic changes are found in liver, gallbladder, pancreas, spleen and kidneys |
| 100022251 | female | 52 | teacher | 100014401 | 5.5 | 1.89 | 0.62 | 60  | 4.53 | 73 | Normal blc 4.62  | 43.3 | 15.92 | 4.09 | 0.795 | 15.6, unde  | 93.79  | 101 | No               | The size ar 1.53 | 166.8 | 227                                                                                                                                                                                           | 2.25 | No obvious abnormal ultrasonographic changes of thyroid<br>Hyperplasia of bilateral mammary glands<br>Postmenopausal uterus;Pelvic effusion<br>Bilateral carotid intima-media thickening                                                                 |

|                 |    |         |              |      |      |    |      |    |                 |      |       |      |       |                  |     |    |                 |       |     |      |                                                                                                                                                                                                                                                      |
|-----------------|----|---------|--------------|------|------|----|------|----|-----------------|------|-------|------|-------|------------------|-----|----|-----------------|-------|-----|------|------------------------------------------------------------------------------------------------------------------------------------------------------------------------------------------------------------------------------------------------------|
| 100022251male   | 59 | teacher | 1000144017.3 | 1.58 | 1.25 | 84 | 5.24 | 98 | Increased s7.92 | 74.1 | 16.38 | 5.48 | 2.090 | 25.3, overv73.73 | 142 | No | The size ar1.60 | 171.1 | 406 | 3.02 | Fatty liver;Right renal cyst<br>Thyroid nodules (TI-RADS3)<br>Bilateral carotid arteries without obvious abnormality<br>Fatty liver;Hepatic cyst                                                                                                     |
| 100022251male   | 55 | teacher | 1000144016.0 | 1.35 | 1.27 | 78 | 5.41 | 79 | Normal blc4.51  | 65.3 | 18.68 | 5.08 | 1.240 | 22.3, norm92.95  | 111 | No | The size ar1.52 | 171.3 | 366 | 3.55 | Thyroid nodules (TI-RADS3)<br>Bilateral carotid intima-media thickening and plaque formation<br>Hepatic cyst;Hypoechoic left adrenal area (further examination recommended)<br>Thyroid nodules (TI-RADS3)                                            |
| 100022251female | 53 | teacher | 1000144015.5 | 1.50 | 0.91 | 66 | 5.90 | 64 | Increased s4.48 | 61   | 17.79 | 4.63 | 2.610 | 22.1, norm73.25  | 152 | No | The size ar1.12 | 166.1 | 282 | 3.95 | Hyperplasia of bilateral mammary glands<br>No obvious abnormality is found in uterine appendages<br>Bilateral carotid intima-media thickening<br>Fatty liver;Hepatic cyst                                                                            |
| 100022251male   | 56 | teacher | 1000144015.7 | 1.29 | 1.80 | 69 | 4.32 | 89 | Normal blc4.52  | 78.5 | 19.70 | 5.76 | 1.810 | 26.8, overv88.15 | 118 | No | The size ar1.98 | 171.3 | 360 | 2.32 | Thyroid nodules (TI-RADS2)<br>Bilateral carotid intima-media thickening                                                                                                                                                                              |
| 100022251female | 56 | teacher | 1000222516   |      |      |    |      |    |                 |      |       |      |       |                  |     | No |                 |       |     |      | No obvious abnormal ultrasonographic changes are found in liver, gallbladder, pancreas, spleen and kidneys                                                                                                                                           |
| 100022251female | 47 | teacher | 1000222515.7 | 1.23 | 1.07 | 65 | 4.03 | 93 | Normal blc5.63  | 54.7 | 16.46 | 4.53 | 2.050 | 20.8, norm95.55  | 98  | No | The size ar1.52 | 162.2 | 308 | 2.36 | Thyroid nodules (TI-RADS3)<br>Hyperplasia of bilateral mammary glands<br>No obvious abnormality is found in uterine appendages<br>Bilateral carotid intima-media thickening<br>Echo thickening of liver parenchyma (further examination recommended) |
| 100022251male   | 54 | teacher | 1000222515.4 | 0.88 | 1.47 | 84 | 3.96 | 92 | Normal blc5.12  | 73.3 | 15.92 | 5.36 | 2.000 | 25, overwe91.08  | 132 | No | The size ar1.46 | 171.4 | 452 | 2.49 | No obvious abnormal ultrasonographic changes of thyroid<br>Bilateral carotid intima-media thickening                                                                                                                                                 |

|           |        |    |         |              |      |      |    |      |    |                  |      |       |      |       |                    |     |    |                  |       |     |      |                                                                                                                                                                                                                                                                                                                                                       |
|-----------|--------|----|---------|--------------|------|------|----|------|----|------------------|------|-------|------|-------|--------------------|-----|----|------------------|-------|-----|------|-------------------------------------------------------------------------------------------------------------------------------------------------------------------------------------------------------------------------------------------------------------------------------------------------------------------------------------------------------|
| 100022251 | female | 57 | teacher | 1000222515.7 | 1.90 | 0.92 | 94 | 5.88 | 65 | Elevated blc3.93 | 53   | 17.11 | 4.73 | 2.870 | 20.7, norm 59.34   | 149 | No | The size ar 1.11 | 159.9 | 290 | 3.24 | No obvious abnormal ultrasonographic changes are found in liver, gallbladder, pancreas, spleen and kidneys<br>Thyroid nodules (TI-RADS3)<br>Hyperplasia of bilateral mammary glands<br>IUD;fibroid;Recheck after filling bladder or further check if necessary<br>Bilateral carotid intima-media thickening and left plaque formation<br>Hepatic cyst |
| 100022252 | male   | 58 | teacher | 1000002785.8 | 1.94 | 0.54 | 78 | 5.46 | 54 | Normal blc4.29   | 71.2 | 19.40 | 6.48 | 4.970 | 24.9, overv 105.70 | 138 | No | The size ar 1.99 | 169   | 362 | 3.28 | Thyroid nodules (TI-RADS3)<br>Bilateral carotid intima-media thickening<br>Fatty liver;Hepatic cyst                                                                                                                                                                                                                                                   |
| 100022252 | male   | 58 | teacher | 1000002786.0 | 1.05 | 1.95 | 84 | 4.87 | 76 | Normal blc5.08   | 81.4 | 19.17 | 5.31 | 1.350 | 25.4, overv 75.24  | 123 | No | The thyroic 1.42 | 178.9 | 306 | 3.03 | Thyroid nodules (TI-RADS3);Periodic review is recommended<br>Bilateral carotid intima-media thickening and plaque formation<br>Fatty liver<br>Thyroid inhomogeneity change (it is recommended to combine thyroid function examination);Thyroid nodules (TI-RADS3)                                                                                     |
| 100022252 | male   | 56 | teacher | 1000055516.8 | 0.92 | 0.87 | 97 | 2.98 | 75 | Elevated bl8.87  | 76   | 20.70 | 5.69 | 1.820 | 24.5, overv 80.83  | 144 | No | The thyroic 1.50 | 176.3 | 208 | 1.72 | Bilateral carotid intima-media thickening and right plaque formation;Recheck recommended<br>Fatty liver;Hepatic cyst;Right renal cyst<br>Diffuse thyroid disease (combined with thyroid function examination is recommended)                                                                                                                          |
| 100022252 | male   | 56 | teacher | 1000026315.6 | 1.49 | 1.40 | 82 | 6.01 | 64 | Normal blc4.15   | 73.4 | 13.90 | 5.60 | 2.290 | 25.9, overv 62.35  | 135 | No | The size ar 1.53 | 168.2 | 366 | 3.68 | Bilateral carotid intima-media thickening<br>No obvious abnormal ultrasonographic changes are found in liver, gallbladder, pancreas, spleen and kidneys                                                                                                                                                                                               |
| 100022252 | male   | 58 | teacher | 1000144005.5 | 1.14 | 1.28 | 78 | 5.62 | 60 | Normal blc5.07   | 66.2 | 19.64 | 5.57 | 1.280 | 23.5, norm 104.20  | 130 | No | The size ar 1.90 | 168   | 479 | 3.85 | Nodule of right thyroid lobe (TI-RADS2)<br>Bilateral carotid intima-media thickening and left plaque formation                                                                                                                                                                                                                                        |

|           |        |    |         |              |      |      |    |      |     |           |         |      |       |      |       |             |        |     |    |             |      |       |     |      |                                                                                                                                                                                                                                                                                                                                                                                                       |
|-----------|--------|----|---------|--------------|------|------|----|------|-----|-----------|---------|------|-------|------|-------|-------------|--------|-----|----|-------------|------|-------|-----|------|-------------------------------------------------------------------------------------------------------------------------------------------------------------------------------------------------------------------------------------------------------------------------------------------------------------------------------------------------------------------------------------------------------|
| 100022252 | female | 52 | teacher | 1000144016.2 | 1.10 | 2.27 | 74 | 4.95 | 103 | Increased | 5.73    | 81.7 | 18.33 | 5.84 | 0.675 | 31.6, obese | 110.80 | 146 | No | Thyroid gl  | 1.75 | 160.8 | 479 | 3.09 | Fatty liver;Low echo in the liver (considering the possibility of hemangioma, except for heterogeneous fatty liver);Hepatic cyst<br>Multiple thyroid nodules (TI-RADS3)<br>Hyperplasia of bilateral mammary glands<br>fibroid<br>Bilateral carotid arteries without obvious abnormality<br>No obvious abnormal ultrasonographic changes are found in liver, gallbladder, pancreas, spleen and kidneys |
| 100022252 | female | 58 | teacher | 1000002775.5 | 1.27 | 1.62 | 77 | 5.27 | 81  | Normal    | blc5.06 | 60.4 | 19.09 | 5.26 | 2.320 | 22.1, norm  | 106.80 | 137 | No |             | 1.64 | 165.5 | 307 | 3.26 | Thyroid nodules (TI-RADS3. M suggest close observation)<br>Hyperplasia of bilateral mammary glands<br>Postmenopausal uterus<br>Bilateral carotid intima-media thickening and plaque formation<br>Fatty liver<br>Thyroid inhomogeneity change (it is recommended to combine thyroid function examination);                                                                                             |
| 100022252 | male   | 54 | teacher | 1000026306.3 | 1.43 | 0.88 | 80 | 3.32 | 97  | Normal    | blc6.64 | 72.9 | 18.93 | 5.61 | 1.010 | 22.5, norm  | 93.65  | 118 | No | The size ar | 1.76 | 180   | 373 | 1.50 | Thyroid nodules (TI-RADS3)<br>Bilateral carotid intima-media thickening<br>Fatty liver;Hepatic cyst;Intrahepatic hyperechogenicity (considering the possibility of hemangioma, it is recommended to conduct contrast-enhanced ultrasound examination if necessary);Right renal cyst                                                                                                                   |
| 100022252 | female | 53 | teacher | 1000222525.7 | 1.02 | 1.45 | 70 | 5.13 | 59  | Normal    | blc5.53 | 67.2 | 20.40 | 4.22 | 1.790 | 24.9, overv | 113.80 | 123 | No | The thyroic | 1.56 | 164.2 | 388 | 3.46 | Diffuse thyroid disease (combined with thyroid function examination is recommended);Left lobe nodule of thyroid (TI-RADS3)<br>Bilateral mammary glands without obvious abnormality<br>Postmenopausal uterus;Intrauterine device<br>Bilateral carotid intima-media thickening and                                                                                                                      |

|           |        |    |         |           |     |      |      |    |      |    |             |       |      |       |       |       |             |        |     |    |             |      |       |     |      |                                                                                                                                                                                                                                                                                                                                                                                                                                                                                                                            |
|-----------|--------|----|---------|-----------|-----|------|------|----|------|----|-------------|-------|------|-------|-------|-------|-------------|--------|-----|----|-------------|------|-------|-----|------|----------------------------------------------------------------------------------------------------------------------------------------------------------------------------------------------------------------------------------------------------------------------------------------------------------------------------------------------------------------------------------------------------------------------------------------------------------------------------------------------------------------------------|
| 100022253 | female | 44 | teacher | 100022253 | 5.2 | 1.64 | 1.08 | 55 | 5.53 | 65 | Diastolic h | 4.81  | 54.9 | 12.13 | 3.55  | 1.650 | 21. Norma   | 62.94  | 92  | No | The size ar | 1.20 | 161.6 | 273 | 3.42 | Cholesterol deposition in gallbladder;Polypoid changes of gallbladder;Periodic review is recommended<br>Thyroid nodules (TI-RADS3);Periodic review is recommended<br>Bilateral mammary gland hyperplasia;Bilateral breast nodules (BI-RADS3);Periodic review is recommended<br>Conform to the sonogram of hystero myoma;Cervical cyst;Periodic review is recommended<br>Bilateral carotid arteries without obvious abnormality<br>Hepatic cyst;Intrahepatic calcification;Right renal cyst with calcification of cyst wall |
| 100022253 | male   | 58 | teacher | 100000278 | 5.6 | 2.43 | 0.61 | 92 | 4.52 | 96 | Elevated bl | 5.25  | 65.9 | 18.81 | 24.48 | 0.135 | 23.7, norm  | 109.40 | 151 | No | The size ar | 7.45 | 166.9 | 327 | 1.93 | No obvious abnormal ultrasonographic changes of thyroid<br>Bilateral carotid intima-media thickening<br>Fatty liver<br>Thyroid nodules (TI-RADS3)<br>Bilateral carotid arteries without obvious abnormality<br>Fatty liver;Hepatic cyst                                                                                                                                                                                                                                                                                    |
| 100022253 | male   | 58 | teacher | 100002631 | 5.6 | 0.85 | 0.80 | 97 | 3.71 | 88 | Elevated di | 4.67  | 95.9 | 21.93 | 5.35  | 1.110 | 30.1, obesi | 99.34  | 138 | No | The size ar | 1.56 | 178.6 | 645 | 2.45 | No obvious abnormal ultrasonographic changes of thyroid<br>Bilateral carotid intima-media thickening and plaque formation<br>Fatty liver;Right renal cyst                                                                                                                                                                                                                                                                                                                                                                  |
| 100022246 | male   | 55 | teacher | 100000288 | 6.5 | 1.11 | 2.01 | 66 | 5.24 | 67 | Normal blc  | 5.41  | 87.6 | 16.12 | 5.07  | 2.670 | 26.4, overv | 94.27  | 127 | No | The size ar | 1.66 | 182.3 | 349 | 3.48 | No obvious abnormal ultrasonographic changes of thyroid<br>Bilateral carotid intima-media thickening and left plaque formation                                                                                                                                                                                                                                                                                                                                                                                             |
| 100022246 | male   | 57 | teacher | 100000278 | 6.9 | 0.99 | 2.25 | 74 | 3.41 | 59 | Normal blc  | 10.30 | 77.4 | 19.22 | 5.05  | 2.320 | 25.2, overv | 90.81  | 122 | No | The size ar | 1.48 | 175.3 | 330 | 1.49 | No obvious abnormal ultrasonographic changes of thyroid<br>Bilateral carotid intima-media thickening and left plaque formation                                                                                                                                                                                                                                                                                                                                                                                             |

|           |        |    |         |           |     |      |      |    |      |    |        |         |      |       |      |       |             |        |     |    |                                                                                                                                                                                                                                                     |      |       |     |      |                                                                                                                                                                                                                                                                                                                                                                                         |
|-----------|--------|----|---------|-----------|-----|------|------|----|------|----|--------|---------|------|-------|------|-------|-------------|--------|-----|----|-----------------------------------------------------------------------------------------------------------------------------------------------------------------------------------------------------------------------------------------------------|------|-------|-----|------|-----------------------------------------------------------------------------------------------------------------------------------------------------------------------------------------------------------------------------------------------------------------------------------------------------------------------------------------------------------------------------------------|
| 100022246 | female | 52 | teacher | 100002629 | 5.5 | 1.99 | 0.75 | 61 | 6.14 | 77 | Normal | blc4.10 | 62.4 | 17.38 | 5.13 | 2.730 | 24.2, overv | 97.80  | 112 | No | The size ar                                                                                                                                                                                                                                         | 1.58 | 160.5 | 369 | 3.67 | Hepatic cyst;Left renal cyst with wall calcification;Enhanced echo of left kidney (considering the possibility of hamartoma)<br>Thyroid inhomogeneity change (it is recommended to combine thyroid function examination)<br>Bilateral mammary gland hyperplasia;Bilateral breast nodules (BI-RADS3, M suggests close observation); fibroid<br>Bilateral carotid intima-media thickening |
| 100022247 | female | 53 | teacher | 100002630 | 5.6 | 1.64 | 0.87 | 79 | 3.95 | 74 | Normal | blc4.75 | 67.7 | 14.26 | 3.88 | 4.100 | 24.3, overv | 64.07  | 128 | No | The size and shape of the thyroid gland can be seen. Several nodules echo can be detected in the bilateral lobes. The larger one is located in the left lobe, about 6x3mm in size. The boundary is clear, and the internal echo is not homogeneous. | 1.24 | 166.8 | 240 | 1.90 | Hepatic cyst;Left renal calcification<br>Thyroid nodules (TI-RADS3)<br>Hyperplasia of bilateral mammary glands<br>Postmenopausal uterus;Low echo in the posterior wall of uterus (considering the possibility of myoma);<br>Bilateral carotid arteries without obvious abnormality                                                                                                      |
| 100022247 | female | 45 | teacher | 100002631 | 5.7 | 1.29 | 1.18 | 68 | 3.80 | 63 | Normal | blc5.03 | 58.7 | 15.72 | 4.46 | 1.380 | 22.8, norm  | 100.20 | 107 | No | The size ar                                                                                                                                                                                                                                         | 1.60 | 160.4 | 331 | 2.14 | Polypoid lesion of gallbladder<br>Nodule of right thyroid lobe (TI-RADS2)<br>Hyperplasia of bilateral mammary glands<br>Pelvic effusion<br>Bilateral carotid arteries without obvious abnormality                                                                                                                                                                                       |



|           |        |    |         |              |      |      |    |      |    |                      |      |      |       |      |                  |             |        |     |                       |             |      |       |     |      |                                                                                                                                                                                                                                                                                                                                                                                                                                                                                                                                                                                                                                               |
|-----------|--------|----|---------|--------------|------|------|----|------|----|----------------------|------|------|-------|------|------------------|-------------|--------|-----|-----------------------|-------------|------|-------|-----|------|-----------------------------------------------------------------------------------------------------------------------------------------------------------------------------------------------------------------------------------------------------------------------------------------------------------------------------------------------------------------------------------------------------------------------------------------------------------------------------------------------------------------------------------------------------------------------------------------------------------------------------------------------|
| 100022247 | female | 56 | teacher | 1000026315.6 | 1.63 | 0.70 | 75 | 5.63 | 73 | Normal blc           | 5.57 | 66.6 | 17.56 | 5.50 | 4.420            | 23.5, norm  | 116.00 | 118 | No                    | The size ar | 2.01 | 168.3 | 291 | 3.53 | Hepatic cyst<br>No obvious<br>abnormal<br>ultrasonographic<br>changes of thyroid<br>Bilateral mammary<br>gland<br>hyperplasia;Bilateral<br>breast nodules (BI-<br>RADS3)<br>Postmenopausal<br>uterus<br>Bilateral carotid<br>intima-media<br>thickening and left<br>plaque formation<br>Hepatic cyst                                                                                                                                                                                                                                                                                                                                          |
| 100022247 | male   | 51 | teacher | 1000026315.6 | 1.79 | 1.60 | 86 | 5.00 | 72 | Normal blc           | 5.20 | 73.1 | 22.51 | 5.51 | 4.570            | 26.3, overv | 110.40 | 128 | No                    | The size ar | 1.46 | 166.6 | 372 | 2.69 | Thyroid nodules (TI-<br>RADS3)<br>Bilateral carotid<br>arteries without<br>obvious abnormality<br>Polypoid lesion of<br>gallbladder<br>Diffuse thyroid<br>disease (combined<br>with thyroid function<br>examination is<br>recommended);Multi<br>ple thyroid nodules<br>(TI-RADS3)<br>Hyperplasia of<br>bilateral mammary<br>glands<br>Conform to the<br>sonogram of<br>adenomyosis<br>Bilateral carotid<br>intima-media<br>thickening<br>Fatty liver;Polypoid<br>lesion of gallbladder<br>Multiple thyroid<br>nodules (TI-RADS3)<br>Bilateral carotid<br>intima-media<br>thickening and<br>plaque formation<br>Fatty liver;Left renal<br>cyst |
| 100022247 | female | 54 | teacher | 1000026325.5 | 1.39 | 1.23 | 78 | 5.21 | 88 | Normal blc           | 5.21 | 66.4 | 20.70 | 4.53 | 2.960            | 26. Overwe  | 118.50 | 131 | No                    | The size ar | 1.41 | 159.7 | 295 | 3.20 | Nodule of right<br>thyroid lobe (TI-<br>RADS3)<br>Bilateral carotid<br>intima-media<br>thickening<br>Hepatic<br>cyst;Gallstone<br>Diffuse thyroid<br>disease (combined<br>with thyroid function<br>examination is<br>recommended)<br>Hyperplasia of<br>bilateral mammary<br>glands<br>Bilateral carotid<br>intima-media<br>thickening and right<br>plaque formation<br>Fatty liver;Hepatic<br>cyst                                                                                                                                                                                                                                            |
| 100022247 | male   | 58 | teacher | 1000026323   |      |      | 83 |      | 84 | Normal blood pressur | 75.9 |      |       |      | 24.7, overweight |             | 131    | No  | The size and shape of | 175.2       |      |       |     |      | No obvious<br>abnormal<br>ultrasonographic<br>changes of thyroid<br>Bilateral carotid<br>arteries without<br>obvious abnormality                                                                                                                                                                                                                                                                                                                                                                                                                                                                                                              |
| 100022247 | male   | 52 | teacher | 1000144005.5 | 1.06 | 2.32 | 94 | 5.00 | 79 | Elevated bl          | 5.10 | 89.8 | 16.32 | 5.32 | 1.640            | 28.8, obesi | 89.96  | 146 | No                    | The size ar | 1.85 | 176.7 | 409 | 2.81 |                                                                                                                                                                                                                                                                                                                                                                                                                                                                                                                                                                                                                                               |
| 100022247 | female | 54 | teacher | 1000144006.0 | 1.86 | 0.91 | 64 | 4.86 | 59 | Normal blc           | 5.39 | 71.6 | 19.81 | 3.83 | 3.510            | 24.4, overv | 97.01  | 123 | No                    | The size ar | 1.03 | 171.3 | 381 | 2.57 |                                                                                                                                                                                                                                                                                                                                                                                                                                                                                                                                                                                                                                               |
| 100022247 | male   | 59 | teacher | 1000222475.6 | 0.92 | 3.12 | 70 | 5.35 | 57 | Normal blc           | 4.22 | 75.4 | 18.51 | 4.91 | 2.390            | 26.7, overv | 95.39  | 120 | No                    | The size ar | 1.68 | 168   | 390 | 2.73 |                                                                                                                                                                                                                                                                                                                                                                                                                                                                                                                                                                                                                                               |

|          |        |    |         |          |     |      |      |     |      |    |             |      |      |       |      |       |             |        |     |    |             |      |       |     |      |                                                                                                                                                                                                                                                                                                                                                                                                                                                                                                                                                                                                                                                                                      |
|----------|--------|----|---------|----------|-----|------|------|-----|------|----|-------------|------|------|-------|------|-------|-------------|--------|-----|----|-------------|------|-------|-----|------|--------------------------------------------------------------------------------------------------------------------------------------------------------------------------------------------------------------------------------------------------------------------------------------------------------------------------------------------------------------------------------------------------------------------------------------------------------------------------------------------------------------------------------------------------------------------------------------------------------------------------------------------------------------------------------------|
| 10002224 | female | 48 | teacher | 10002224 | 5.3 | 1.06 | 1.92 | 70  | 4.85 | 77 | Normal blc  | 4.78 | 70.2 | 13.38 | 4.31 | 2.740 | 27. Overwe  | 85.35  | 111 | No | The size ar | 1.42 | 161.2 | 361 | 2.83 | Fatty liver<br>No obvious<br>abnormal<br>ultrasonographic<br>changes of thyroid<br>Bilateral mammary<br>gland<br>hyperplasia;Right<br>breast nodule (BI-<br>RADS3),<br>reexamination<br>recommended;<br>After hysterectomy<br>Bilateral carotid<br>intima-media<br>thickening<br>Fatty liver<br>No obvious<br>abnormal<br>ultrasonographic<br>changes of thyroid<br>Bilateral carotid<br>intima-media<br>thickening and<br>plaque<br>formation;Stenosis at<br>the origin of left<br>internal carotid<br>artery (less than 50%)<br>Hepatic cyst<br>Diffuse thyroid<br>disease (combined<br>with thyroid function<br>examination is<br>recommended);Thyr<br>oid nodules (TI-<br>RADS3) |
| 10002224 | male   | 50 | teacher | 10002224 | 5.9 | 1.29 | 1.68 | 104 | 5.94 | 79 | Elevated bl | 5.78 | 91.7 | 17.62 | 5.21 | 2.960 | 28.4, obesi | 103.40 | 161 | No | The size ar | 1.48 | 179.7 | 356 | 3.69 | Hyperplasia of<br>bilateral mammary<br>glands<br>Postmenopausal<br>uterus;fibroid<br>Bilateral carotid<br>intima-media<br>thickening and right<br>plaque formation<br>Fatty liver<br>Left lobe nodule of<br>thyroid (TI-RADS2)<br>Bilateral carotid<br>intima-media<br>thickening                                                                                                                                                                                                                                                                                                                                                                                                    |
| 10002224 | female | 60 | teacher | 10000277 | 6.2 | 2.09 | 0.94 | 79  | 5.79 | 82 | Normal blc  | 5.65 | 53.5 | 19.63 | 5.17 | 1.640 | 21.1, norm  | 107.50 | 122 | No | The size ar | 1.69 | 159.3 | 283 | 3.50 |                                                                                                                                                                                                                                                                                                                                                                                                                                                                                                                                                                                                                                                                                      |
| 10002224 | male   | 52 | teacher | 10000262 | 5.5 | 1.11 | 1.80 | 89  | 4.80 | 71 | Normal blc  | 5.10 | 89.9 | 14.46 | 4.88 | 1.750 | 27.4, overv | 86.46  | 131 | No | The size ar | 1.36 | 181.3 | 520 | 2.89 |                                                                                                                                                                                                                                                                                                                                                                                                                                                                                                                                                                                                                                                                                      |

|          |        |    |         |          |     |      |      |    |      |    |        |     |      |      |       |      |       |           |        |     |    |             |      |       |     |      |                                                                                                                                                                                                                                                                                                                                                                                                                                                                 |
|----------|--------|----|---------|----------|-----|------|------|----|------|----|--------|-----|------|------|-------|------|-------|-----------|--------|-----|----|-------------|------|-------|-----|------|-----------------------------------------------------------------------------------------------------------------------------------------------------------------------------------------------------------------------------------------------------------------------------------------------------------------------------------------------------------------------------------------------------------------------------------------------------------------|
| 10002224 | female | 58 | teacher | 10000263 | 5.7 | 1.45 | 1.15 | 61 | 6.68 | 92 | Normal | blc | 4.83 | 64.4 | 16.93 | 4.76 | 1.150 | 23. Norma | 107.80 | 104 | No | The size ar | 1.59 | 167.4 | 309 | 4.22 | Intrahepatic hyperechogenicity (considering the possibility of hemangioma, it is recommended to conduct contrast-enhanced ultrasound examination if necessary); Hepatic cyst<br>Thyroid nodules (M: TI-RADS4a, other nodules TI-RADS3); it is recommended to have contrast-enhanced ultrasound examination or further examination if necessary<br>Bilateral mammary gland hyperplasia; Right breast calcification<br>Postmenopausal uterus<br>Bilateral carotid |
|----------|--------|----|---------|----------|-----|------|------|----|------|----|--------|-----|------|------|-------|------|-------|-----------|--------|-----|----|-------------|------|-------|-----|------|-----------------------------------------------------------------------------------------------------------------------------------------------------------------------------------------------------------------------------------------------------------------------------------------------------------------------------------------------------------------------------------------------------------------------------------------------------------------|

n
